# Supplementary material for: Emergent supramolecular assembly properties of a recognition-encoded oligoester
Source: Royal Society of Chemistry journal article supplement (doi:10.1039/c9sc01669d), 2019-01-01
Supplement: c9sc01669d1.pdf [file c9sc01669d1.pdf]

**Emergent Supramolecular Assembly Properties of a Recognition-Encoded Oligoester**  
**Supplementary Information**

Filip T. Szczypiński, Luca Gabrielli and Christopher A. Hunter

**Contents**

|          |                                                                           |           |
|----------|---------------------------------------------------------------------------|-----------|
| <b>1</b> | <b>General Methods</b>                                                    | <b>2</b>  |
| <b>2</b> | <b>Synthesis</b>                                                          | <b>3</b>  |
| 2.1      | Synthesis of <b>3</b> . . . . .                                           | 3         |
| 2.2      | Synthesis of <b>7</b> . . . . .                                           | 5         |
| <b>3</b> | <b>Melting experiments: Further Details</b>                               | <b>14</b> |
| <b>4</b> | <b>Dimerisation Isotherm Derivation and Implementation</b>                | <b>16</b> |
| 4.1      | AD Dimerisation Isotherm in Chloroform . . . . .                          | 18        |
| 4.2      | ADAD Dimerisation Isotherm in Chloroform . . . . .                        | 20        |
| 4.3      | AD Dimerisation Isotherm in TCE . . . . .                                 | 24        |
| 4.4      | ADAD Dimerisation Isotherm in TCE . . . . .                               | 26        |
| <b>5</b> | <b>Two-State Melting Isochore Derivation and Implementation</b>           | <b>28</b> |
| 5.1      | AD Two-State Melting Isochore . . . . .                                   | 31        |
| 5.2      | ADAD Two-State Melting Isochore - No Constraints . . . . .                | 32        |
| 5.3      | ADAD Two-State Melting Isochore - Limiting Shifts Constrained . . . . .   | 33        |
| <b>6</b> | <b>Three-State Melting Isochore Derivation and Implementation</b>         | <b>34</b> |
| 6.1      | ADAD Three-State Melting Isochore - No Constraints . . . . .              | 37        |
| 6.2      | ADAD Three-State Melting Isochore - Limiting Shifts Constrained . . . . . | 38        |
| <b>7</b> | <b>Molecular Modelling</b>                                                | <b>39</b> |

## 1 General Methods

Commercial reagents were used as received without further purification. Dichloromethane and tetrahydrofuran were purified and dried using PureSolv MD 5 Solvent Purification System. Routine and characterisation NMR spectra were recorded on Bruker 400 MHz Avance III HD Smart Probe, 400 MHz Smart Probe, and 400 MHz Avance III HD Spectrometers at 298 K and using Wilmar 5 mm Thin Wall Precision NMR sample tubes. Characterisation spectra for ADAD were recorded by the NMR Service at the Department of Chemistry on 500 MHz DCH Cryoprobe and 400 MHz Neo Prodigy Spectrometers.  $^1\text{H}$ - $^1\text{H}$  DQF COSY,  $^1\text{H}$ - $^{13}\text{C}$  HMBC,  $^1\text{H}$ - $^{31}\text{P}$  HMBC, and  $^{13}\text{C}$ - $^{19}\text{F}$  HMBC of ADAD were recorded with 35.5% Poisson gap non-uniform sampling.  $^1\text{H}$ - $^{13}\text{C}$  HSQC,  $^{13}\text{C}$ - $^{19}\text{F}$  HSQC, and  $^{13}\text{C}$ - $^{19}\text{F}$  HMQC of ADAD were recorded with 25% Poisson gap non-uniform sampling. NMR dilutions were performed on Bruker 400 MHz Avance III HD Smart Probe Spectrometer by adding aliquotes of a concentrated solution into pure solvent. Upon each addition, the solution was manually shaken before acquiring the spectrum, which was sufficient time for equilibration to be reached. Variable temperature NMR experiments were performed on 500 MHz AVIII HD Smart Probe Spectrometer. DOSY experiments were performed on Bruker 400 MHz Avance III HD Smart Probe Spectrometer. The standard Bruker pulse program, ledbpgp2s, employing a stimulated echo and longitudinal eddy-current delay (LED) using bipolar gradient pulses for diffusion using 2 spoil gradients of 600  $\mu\text{s}$  was utilized. Rectangular gradients were used with a total duration of 3 ms. Gradient recovery delays were 200  $\mu\text{s}$ . Diffusion times were 160  $\mu\text{s}$ . Individual rows of the quasi-2D diffusion databases were phased and baseline corrected. DOSY data analyses were performed using Bruker Dynamics Centre software, using area integrals of manually selected peaks. Chemical shifts for  $^1\text{H}$ ,  $^{13}\text{C}$ ,  $^{19}\text{F}$ , and  $^{31}\text{P}$  are reported in ppm on the  $\delta$  scale;  $^1\text{H}$  and  $^{13}\text{C}$  were referenced to the residual solvent peak;  $^{19}\text{F}$  and  $^{31}\text{P}$  were unreferenced. Coupling constants ( $J$ ) are reported in hertz (Hz). The following abbreviations are used to describe signal multiplicity for  $^1\text{H}$  and  $^{13}\text{C}$  NMR spectra: s: singlet, d: doublet, t: triplet, m: multiplet, br: broad. High resolution electrospray ionization mass spectrometry (HRMS-ESI) was performed on Waters LCT Premier TOF Spectrometer or by the Mass Spectrometry Service at the Department of Chemistry. Infrared (IR) spectra were recorded on Bruker Alpha FTIR Spectrometer with single reflection diamond Platinum ATR. The liquid chromatography mass spectrometry (LC-MS) analysis of samples was performed using Waters Acquity H-class UPLC coupled with a single quadrupole Waters SQD2. Acquity UPLC CSH C18 Column, 130Å, 1.7  $\mu\text{m}$ , 2.1 mm X 50 mm was used as the UPLC column. The conditions of the UPLC method were as follows: solvent A: water +0.1% Formic acid; solvent B: acetonitrile +0.1% formic acid; gradient of 0-2 minutes 5% - 100%B + 1 minute

100%B with re-equilibration time of 2 minutes. Flow rate: 0.6 ml/min; column temperature of 40 °C; injection volume of 2  $\mu$ L. The signal was monitored at 270 nm. Chromatographic separations were performed on Teledyne ISCO CombiFlash Rf+UV-Vis and CombiFlash Rf+Lumen, using prepacked cartridges of silica (25  $\mu$ m or 50  $\mu$ m PuriFlash Columns). Separated mixtures were solid loaded using Celite or silica gel 60 (Merck, 40–63  $\mu$ m). The signal was monitored at 254 nm, 270 nm, and (if CombiFlash Rf+Lumen) using evaporative light scattering detector.

## 2 Synthesis

### 2.1 Synthesis of 3

A solution of previously reported compounds 1 (260 mg, 0.44 mmol) and 2 (215 mg, 0.44 mmol) in anhydrous dichloromethane (5 ml) with *N,N*-dimethylaminopyridine (11 mg, 0.1 mmol) and EDC-HCl (101 mg, 0.5 mmol) were stirred overnight under nitrogen atmosphere.<sup>1</sup> The mixture was poured into water (10 ml) and the aqueous layer was extracted with dichloromethane (3  $\times$  5 ml). The combined organic extracts were washed with brine (20 ml), dried with anhydrous magnesium sulfate, filtered and concentrated under vacuum. The residue was purified using column chromatography (0-100% ethyl acetate in petroleum ether) to give compound 3 as a white wax (266 mg, 0.25 mmol, 57%).

<sup>1</sup>H NMR (400 MHz, CDCl<sub>3</sub>)  $\delta$  7.83 – 7.28 (m, 20H), 7.22 (d, *J* = 8.4 Hz, 2H), 6.71 (d, *J* = 8.4 Hz, 2H), 6.49 (d, *J* = 8.3 Hz, 2H), 5.18 (s, 2H), 4.38 (br t, *J* = 6.1 Hz, 2H), 4.08 (s, 2H), 4.03 (s, 2H), 3.81 (br t, *J* = 6.1 Hz, 2H), 3.70 (br t, *J* = 6.1 Hz, 2H), 3.54 (br t, *J* = 6.1 Hz, 2H), 2.35 (s, 3H), 2.05 – 1.56 (m, 6H), 1.09 – 0.98 (m, 15H), 0.84 (d, *J* = 6.8 Hz, 6H) ppm.

<sup>13</sup>C NMR (101 MHz, CDCl<sub>3</sub>)  $\delta$  170.1 (d, *J* = 13 Hz), 168.7, 149.5, 147.0, 138.7, 135.2, 135.0, 132.7, 131.5 (d, *J* = 10 Hz), 130.1, 129.4, 128.3, 128.2, 128.0, 128.0, 127.7, 127.4, 124.3, 124.1 (q, *J* = 5 Hz), 122.8 (q, *J* = 272 Hz), 119.3 (d, *J* = 100 Hz), 112.2, 111.0 (d, *J* = 12 Hz), 66.6, 61.9, 61.0, 53.0, 52.3 (d, *J* = 17 Hz), 49.9, 39.7 (d, *J* = 68 Hz), 26.4, 24.4 (d, *J* = 9 Hz), 24.2 (d, *J* = 8 Hz), 23.1 (d, *J* = 4.0 Hz), 20.4, 18.7 ppm.

<sup>19</sup>F NMR (376 MHz, CDCl<sub>3</sub>)  $\delta$  -61.9 ppm.

<sup>31</sup>P NMR (162 MHz, CDCl<sub>3</sub>)  $\delta$  41.2 ppm.

FT-IR (neat): 2955, 2925, 2894, 2862, 1772, 1745, 1598 cm<sup>-1</sup>.

HR-MS (ESI): *m/z* = 1063.4680 [M+H]<sup>+</sup> (calcd. for C<sub>60</sub>H<sub>71</sub>F<sub>2</sub>N<sub>2</sub>O<sub>8</sub>PSi: 1063.4669,  $\Delta$  1.0 ppm).

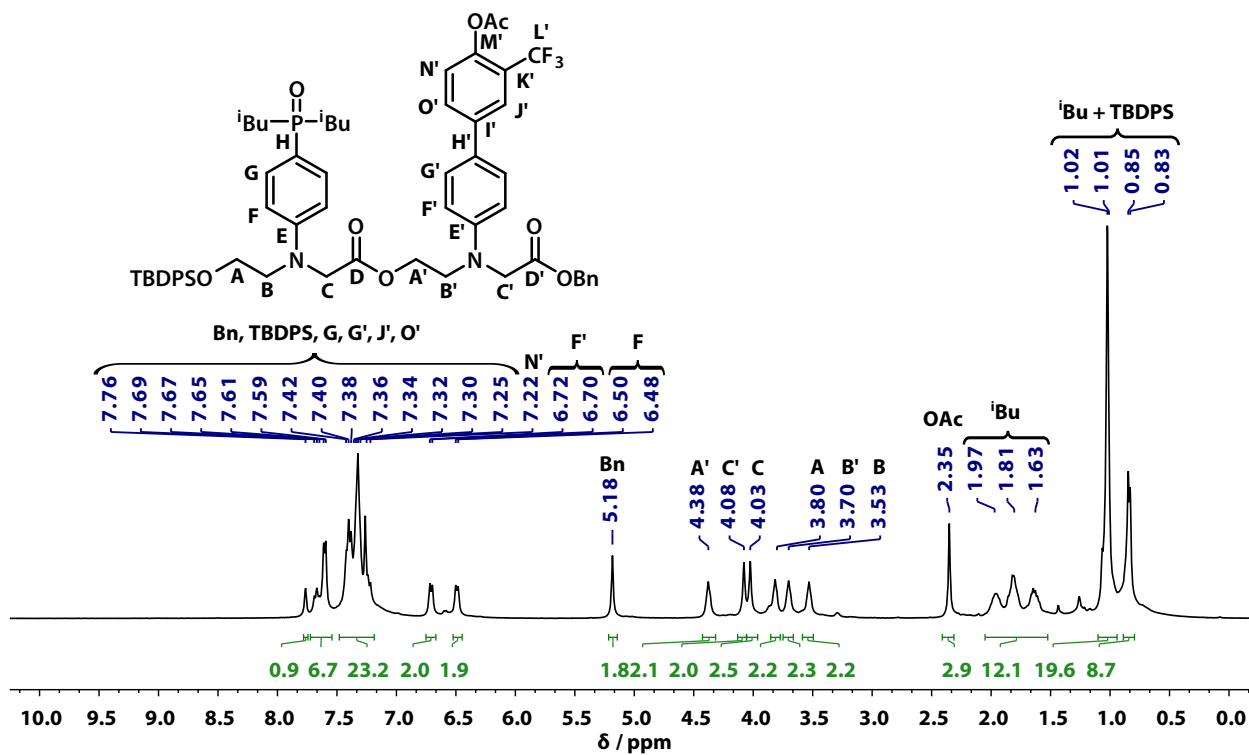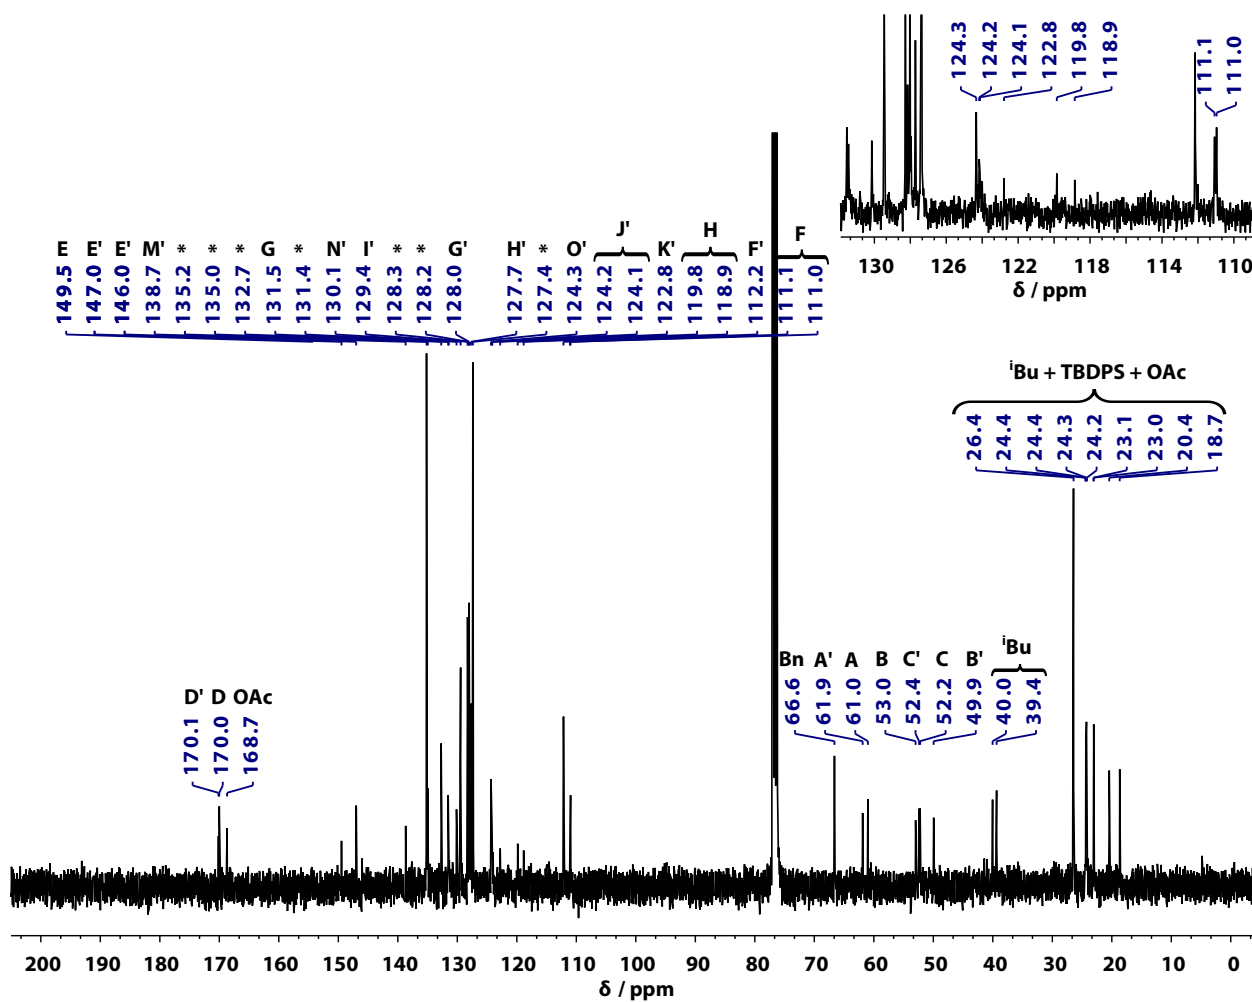

## 2.2 Synthesis of 7

Nitrogen gas was bubbled for 15 min through a suspension of 3 (120 mg, 0.1 mmol) and palladium on carbon (11 mg, 10 wt% loading, 0.01 mmol) in absolute ethanol (10 ml). Hydrogen gas was then purged for 15 min through the suspension, which was subsequently left stirring under hydrogen atmosphere overnight. The reaction mixture was filtered through Celite, washed with ethanol (3×15 ml) and concentrated under vacuum to give intermediate 4 (AD<sup>\*</sup>-COOH) as a white foam (87 mg, 0.09 mmol, 90%).

<sup>1</sup>H NMR (400 MHz, CDCl<sub>3</sub>) δ 7.74 (d, J = 2.1 Hz, 1H), 7.65 (dd, J = 8.4, 2.1 Hz, 1H), 7.63 – 7.29 (m, 14H), 7.19 (d, J = 8.4 Hz, 1H), 6.71 (d, J = 8.5 Hz, 2H), 6.51 (d, J = 8.2 Hz, 2H), 4.36 (t, J = 5.8 Hz, 2H), 4.05 (s, 2H), 3.89 (s, 2H), 3.82 (t, J = 5.8 Hz, 2H), 3.60 (t, J = 5.8 Hz, 2H), 3.55 (t, J = 5.8 Hz, 2H), 2.34 (s, 3H), 2.27 (br s, 1H), 2.04 – 1.63 (m, 6H), 1.02 (s, 9H), 0.99 (d, J = 6.6 Hz, 6H), 0.87 (d, J = 6.5 Hz, 6H) ppm.

HR-MS (ESI): m/z = 973.4228 [M+H]<sup>+</sup> (calcd. for C<sub>53</sub>H<sub>65</sub>N<sub>2</sub>O<sub>8</sub>F<sub>3</sub>PSi: 973.4200, Δ 2.9 ppm).

In parallel, a solution of compound 3 (120 mg, 0.1 mmol) in anhydrous tetrahydrofuran (5 ml) with acetic acid (52 μl, 0.9 mmol) and *n*-tetrabutylammonium acetate (170 μl, 1 M in THF, 0.17 mmol) was stirred under nitrogen atmosphere overnight. Upon completion, the reaction mixture was diluted with water (10 ml) and extracted with ethyl acetate (3 × 10 ml). The combined organic extracts were washed with brine (10 ml), dried with anhydrous magnesium sulfate, filtered and concentrated under vacuum. The residue was filtered through a pad of silica (90% ethyl acetate in petroleum ether, then 5% methanol in dichloromethane) to give intermediate 5 (HO-AD<sup>\*</sup>) as a white foam (69 mg, 0.08 mmol, 76%).

<sup>1</sup>H NMR (400 MHz, CDCl<sub>3</sub>) δ 7.78 (d, J = 2.2 Hz, 1H), 7.70 (dd, J = 8.4, 2.3 Hz, 1H), 7.48 – 7.40 (m, 4H), 7.36 – 7.32 (m, 5H), 7.24 (d, J = 10.1 Hz, 3H), 6.75 (d, J = 8.7 Hz, 2H), 6.61 – 6.57 (m, 2H), 5.20 (s, 2H), 4.46 (t, J = 5.9 Hz, 2H), 4.15 (s, 2H), 4.09 (s, 2H), 3.78 (t, J = 5.7 Hz, 4H), 3.60 (m, 4H), 3.17 (s, 1H), 2.35 (s, 3H), 2.03 – 1.61 (m, 6H), 1.01 (d, J = 6.6 Hz, 6H), 0.84 (d, J = 6.4 Hz, 6H) ppm.

HR-MS (ESI): m/z = 825.3525 [M+H]<sup>+</sup> (calcd. for C<sub>44</sub>H<sub>53</sub>F<sub>3</sub>N<sub>2</sub>O<sub>8</sub>P: 825.3492, Δ 4.0 ppm).

A solution of intermediates 4 (87 mg, 0.09 mmol) and 5 (69 mg, 0.08 mmol) in anhydrous dichloromethane (5 ml) with *N,N*-dimethylaminopyridine (11 mg, 0.1 mmol) and EDC·HCl (101 mg, 0.5 mmol) were stirred overnight under nitrogen atmosphere. The mixture was poured into water (10 ml) and the aqueous layer was extracted with dichloromethane (3 × 5 ml). The combined organic extracts were washed with brine (20 ml), dried with anhydrous magnesium sulfate, filtered and concentrated under vacuum. The residue was filtered through a pad of silica silica (60%, then 100% ethyl acetate in petroleum ether) to give compound 6 as a white wax (141 mg, 0.08 mmol, 99%).

$^1\text{H NMR}$  (400 MHz,  $\text{CDCl}_3$ )  $\delta$  7.74 (m, 2H), 7.61 – 7.56 (m, 5H), 7.48 – 7.27 (m, 20H), 7.23 – 7.20 (m, 2H), 6.69 (d,  $J = 8.8$  Hz, 2H), 6.67 – 6.61 (m, 4H), 6.49 – 6.45 (m, 2H), 5.16 (s, 2H), 4.40 – 4.27 (m, 6H), 4.07 (s, 2H), 4.03 (s, 2H), 3.98 (s, 2H), 3.94 (s, 2H), 3.80 (t,  $J = 5.9$  Hz, 2H), 3.69 (t,  $J = 6.0$  Hz, 2H), 3.62 (m, 4H), 3.53 (t,  $J = 5.7$  Hz, 2H), 2.33 (s, 6H), 2.02 – 1.56 (m, 12H), 1.02 – 0.95 (m, 21H), 0.82 (d,  $J = 6.6$  Hz, 12H) ppm.

HR-MS (ESI):  $m/z = 1779.7497$   $[\text{M}+\text{H}]^+$  (calcd. for  $\text{C}_{97}\text{H}_{115}\text{O}_{15}\text{N}_4\text{F}_6\text{P}_2\text{Si}$ : 1779.7502,  $\Delta -0.3$  ppm).

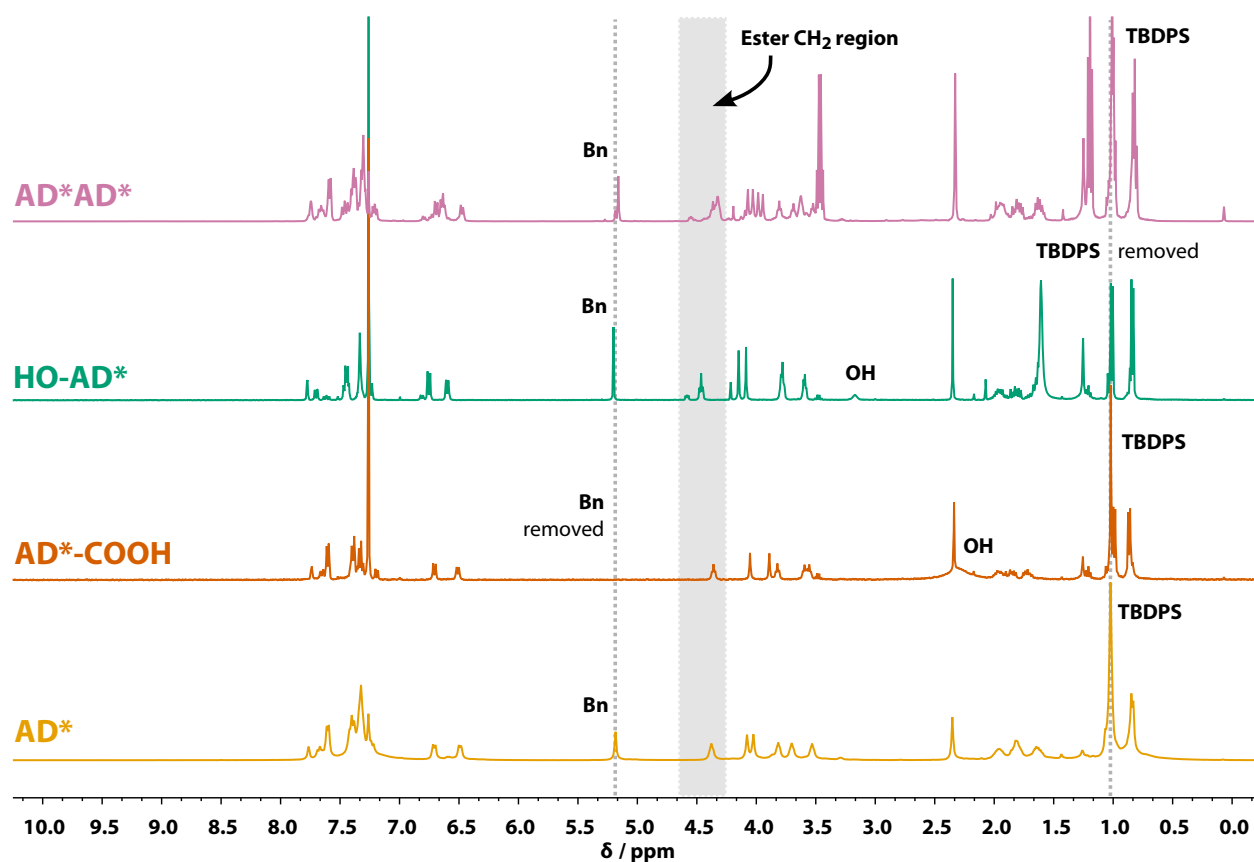

Fig. S1 Stack of  $^1\text{H NMR}$  spectra ( $\text{CDCl}_3$ , 298 K) of intermediates 3 - 6. Chemical shifts of the TBDPS and benzyl protecting groups, removed in the subsequent steps, are highlighted with dashed lines. Ester methylene region, where a new peak appears after EDC coupling, is highlighted in grey.

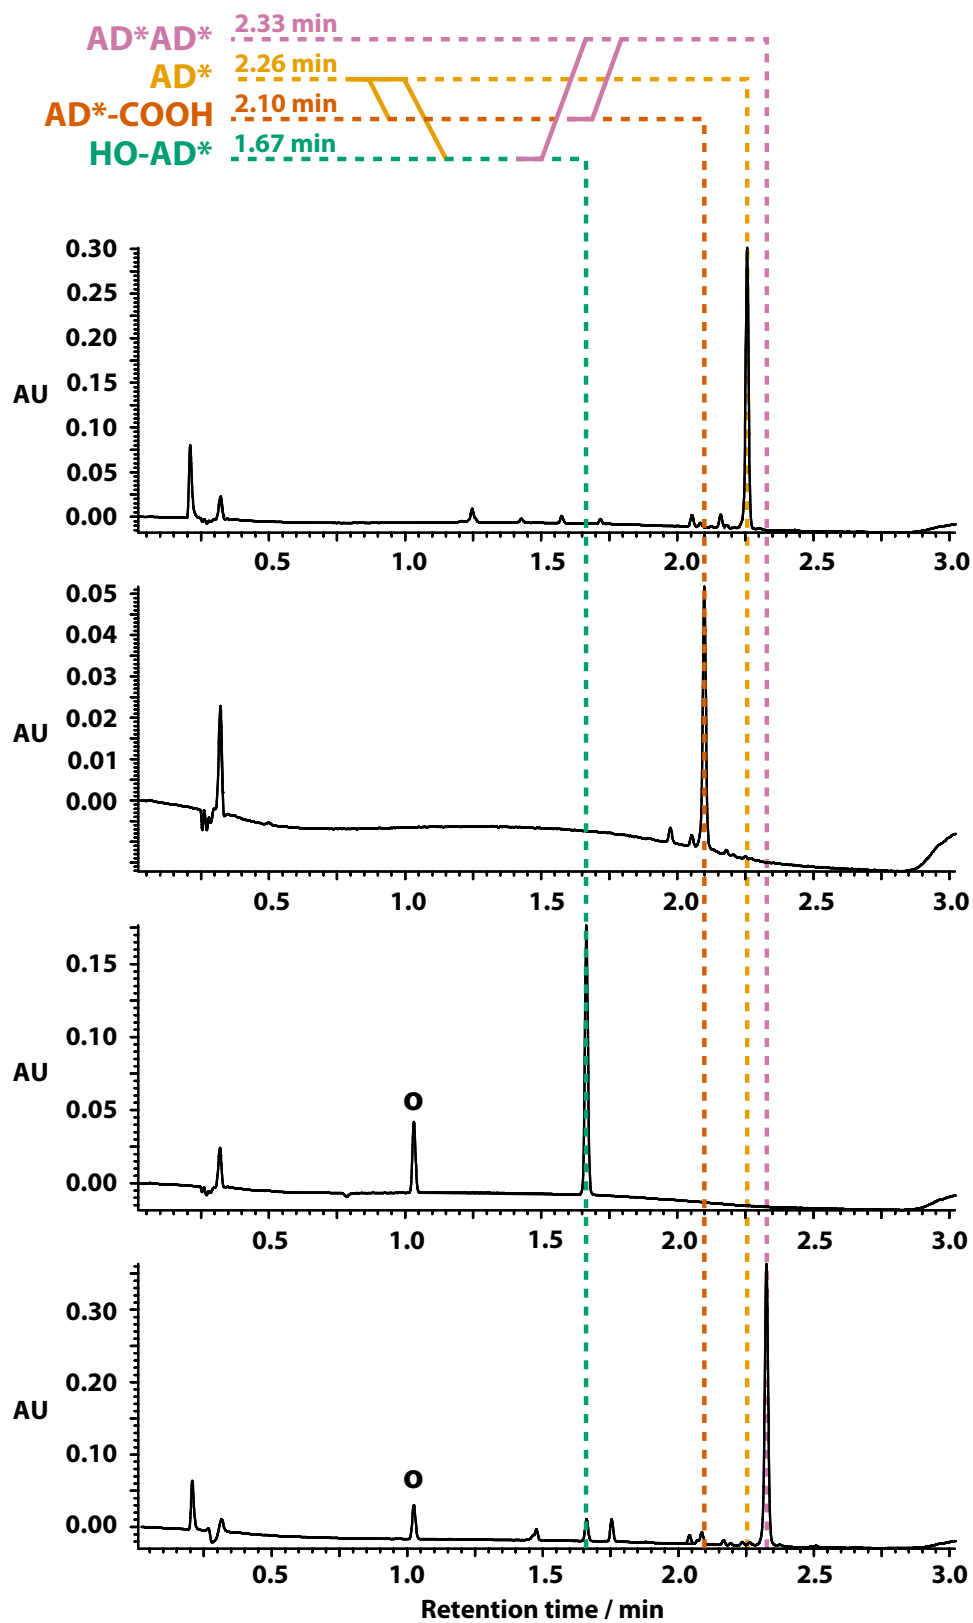

Fig. S2 LC-MS traces (monitored by UV at 270 nm) of the reactions converting AD\* into AD\*AD\*.

A portion of intermediate **6** (35 mg, 0.02 mmol) and ammonium acetate (38.5 mg, 0.5 mmol) were dissolved in a mixture of methanol (1 ml) and water (0.25 ml). The reaction mixture was stirred under nitrogen atmosphere overnight. After completion, the mixture was partitioned between water (20 ml) and ethyl acetate (10 ml). The layers were separated and the aqueous layer was subsequently washed with ethyl acetate (3 × 10 ml). The combined organic extracts were washed with brine (10 ml). The washed solution was dried with anhydrous magnesium sulfate, filtered and concentrated under vacuum. The residue was purified using column chromatography (0-20% methanol in ethyl acetate) to yield compound **4.17** as a colourless oil (13 mg, 0.01 mmol, 38%).

<sup>1</sup>H NMR (500 MHz, CDCl<sub>3</sub>) δ 10.43 (s, 1H), 9.38 (s, 1H), 7.66 – 7.53 (m, 8H), 7.47 – 7.24 (m, 19H), 7.16 (d, J = 8.5 Hz, 1H), 7.10 (d, J = 8.5 Hz, 1H), 6.66 (d, J = 8.5 Hz, 2H), 6.59 – 6.52 (m, 4H), 6.41 (d, J = 6.8 Hz, 2H), 5.15 (s, 2H), 4.36 (t, J = 5.1 Hz, 2H), 4.29 (t, J = 5.6 Hz, 2H), 4.18 (t, J = 5.4 Hz, 2H), 4.02 (s, 2H), 3.98 (s, 2H), 3.90 (s, 2H), 3.80 (t, J = 5.5 Hz, 2H), 3.80 (s, 2H), 3.68 (t, J = 5.1 Hz, 2H), 3.56 (t, J = 5.6 Hz, 2H), 3.52 (t, J = 5.5 Hz, 2H), 3.46 (t, J = 5.4 Hz, 2H), 2.08 – 1.49 (m, 12H), 1.01 (s, 9H), 0.99 (d, J = 6.6 Hz, 6H), 0.97 (d, J = 6.6 Hz, 6H), 0.83 (d, J = 6.6 Hz, 6H), 0.80 (d, J = 6.6 Hz, 6H) ppm.

<sup>13</sup>C NMR (126 MHz, CDCl<sub>3</sub>) δ 170.7, 170.6, 170.3, 170.1, 155.1, 154.5, 150.1 (d, J = 2 Hz), 149.8 (d, J = 2 Hz), 146.7, 146.4, 135.5, 135.4, 133.0, 131.9 (d, J = 10 Hz), 131.8 (d, J = 10 Hz), 131.5, 131.0, 130.7, 130.4, 129.8, 129.6, 129.5, 128.6, 128.4, 128.3, 127.7, 127.5, 127.3, 124.2 (q, J = 273.1 Hz), 124.2 (q, J = 273.1 Hz), 124.1 (d, J = 5 Hz), 124.1 (d, J = 5 Hz), 119.5 (d, J = 101 Hz), 118.2 (d, J = 102 Hz), 118.0 (d, J = 5 Hz), 117.0 (q, J = 30 Hz), 116.7 (q, J = 30 Hz), 112.6, 112.4, 111.7 (d, J = 12 Hz), 111.5 (d, J = 12 Hz), 66.9, 62.3, 62.0, 61.3, 53.4, 52.5, 52.3, 52.1, 51.9, 50.1, 50.0, 49.8, 39.7 (d, J = 68 Hz), 39.7 (d, J = 68 Hz), 29.7, 24.7 (d, J = 9 Hz), 24.7 (d, J = 9 Hz), 24.5 (d, J = 8 Hz), 24.5 (d, J = 8 Hz), 23.4 (d, J = 4 Hz), 19.0 ppm.

<sup>19</sup>F NMR (376 MHz, CDCl<sub>3</sub>) δ -61.7, -61.9 ppm.

<sup>31</sup>P NMR (162 MHz, CDCl<sub>3</sub>) δ 41.9, 41.1 ppm.

FT-IR (neat): 2955, 2918, 2850, 1740, 1612, 1598 cm<sup>-1</sup>.

HR-MS (ESI): m/z = 1695.7255 [M+H]<sup>+</sup> (calcd. for C<sub>93</sub>H<sub>111</sub>O<sub>13</sub>N<sub>4</sub>F<sub>6</sub>P<sub>2</sub>Si: 1695.7291, Δ -2.1 ppm).



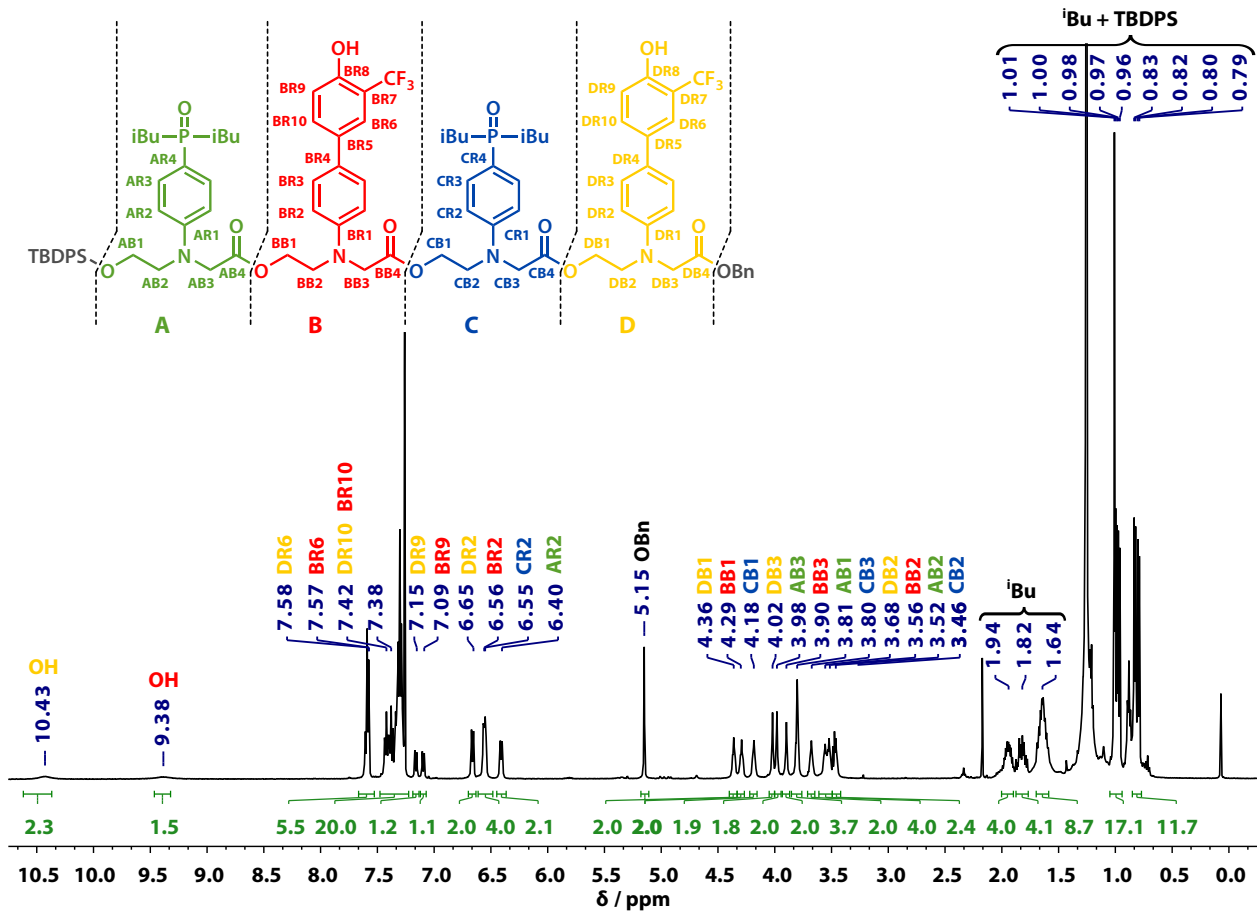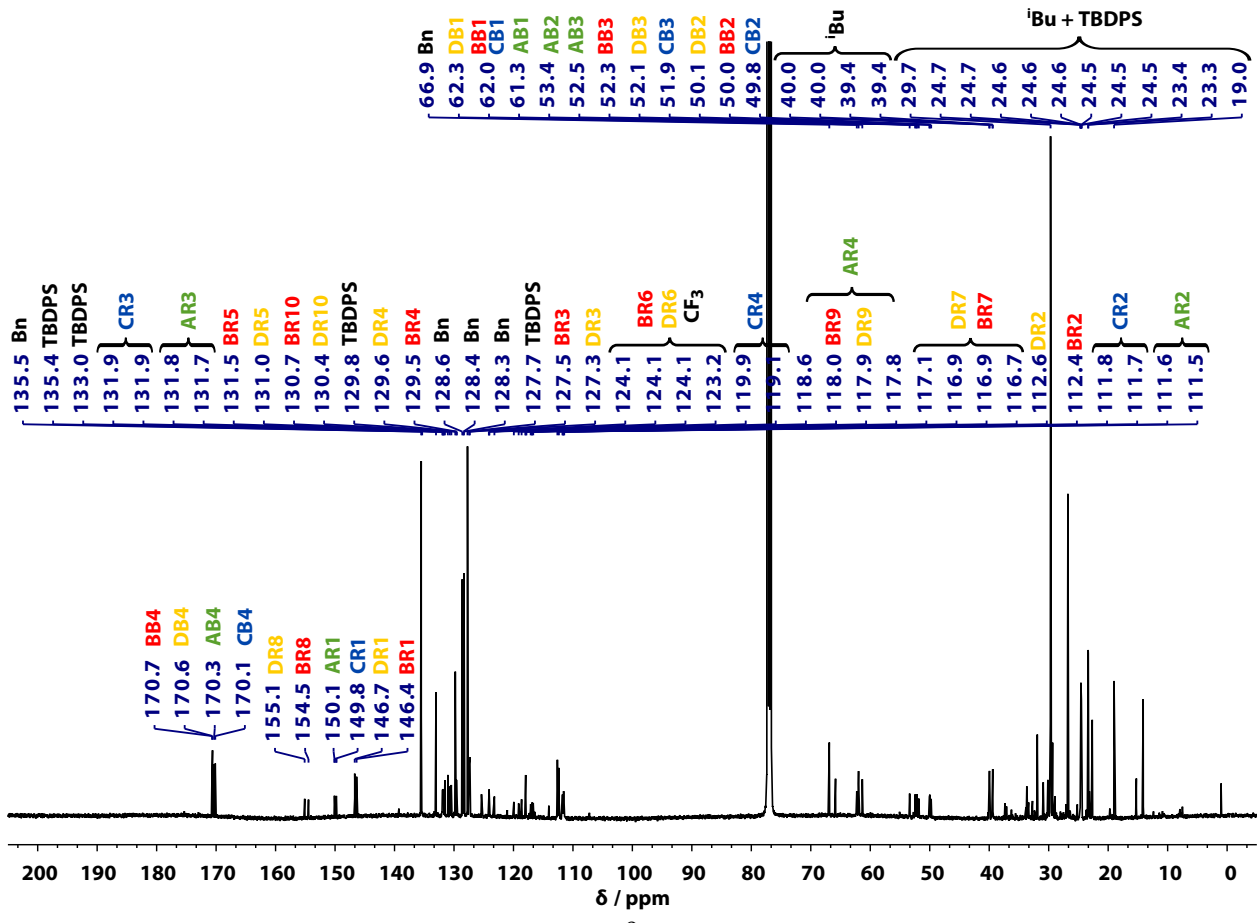

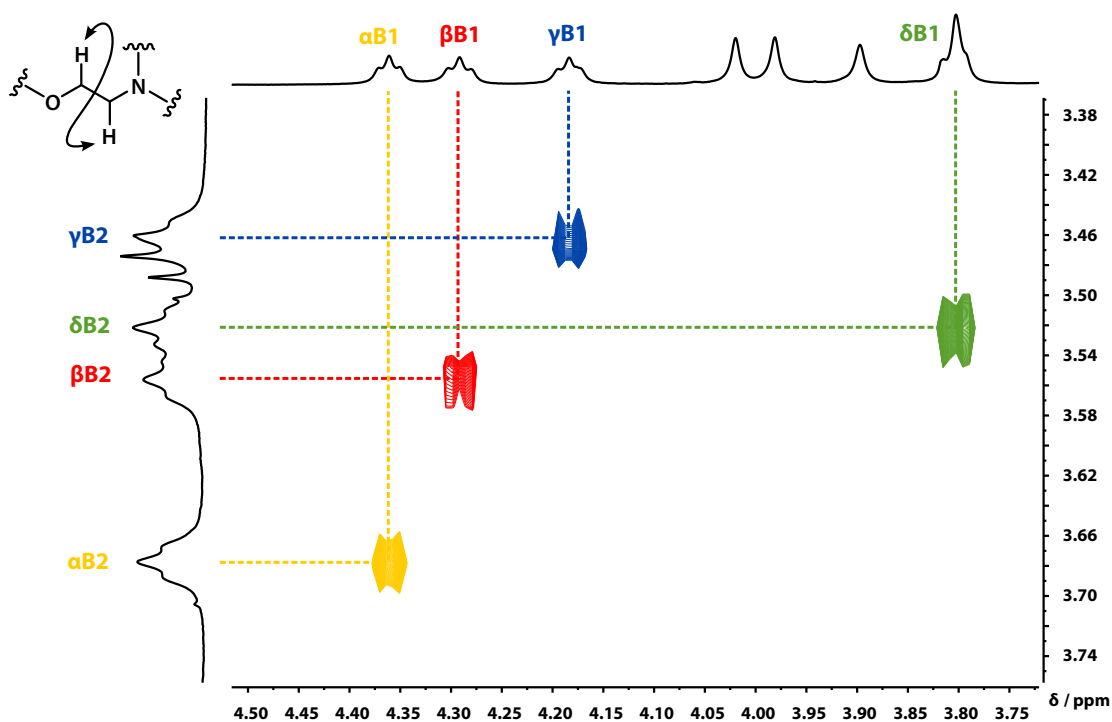

Fig. S3 Aliphatic region of the  $^1\text{H}$ - $^1\text{H}$  DQF COSY (500 MHz,  $\text{CDCl}_3$ , 298 K, *ca.* 5 mM) spectrum of the ADAD 4-mer. Cross-peaks corresponding to different residues are distinguished with colours and Greek letters. The substructure shows the highlighted correlations.

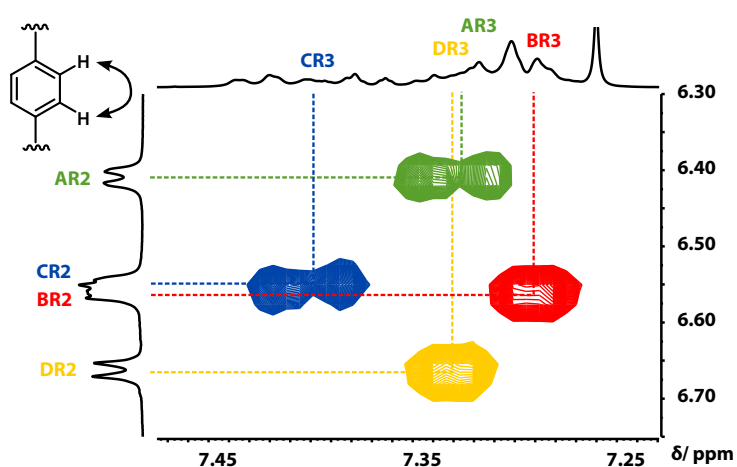

Fig. S4 Aromatic region of the  $^1\text{H}$ - $^1\text{H}$  DQF COSY (500 MHz,  $\text{CDCl}_3$ , 298 K, *ca.* 5 mM) spectrum of the ADAD 4-mer. The substructure shows the highlighted correlations between the signals on the aromatic signals.

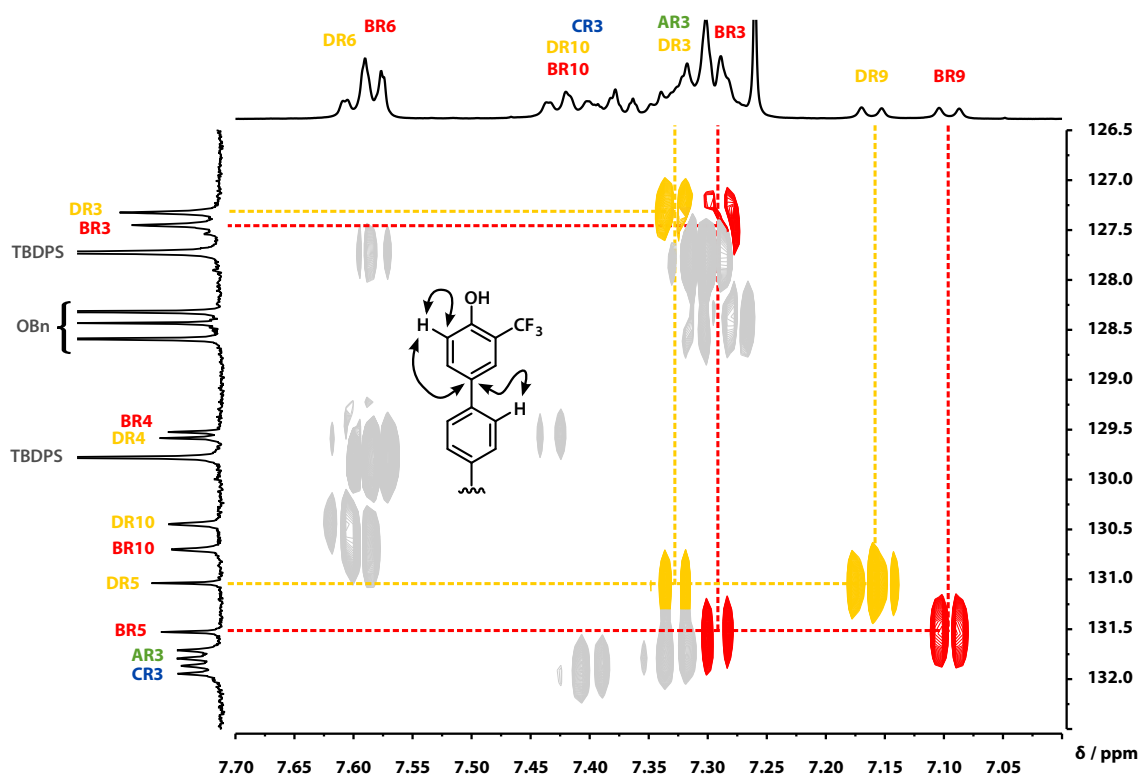

Fig. S5 Part of the  $^1\text{H}$ - $^{13}\text{C}$  HMBC (500 MHz,  $\text{CDCl}_3$ , 298 K, *ca.* 5 mm) spectrum of the ADAD 4-mer. The substructure shows the highlighted correlations between the two separate aromatic systems of the donor residues.

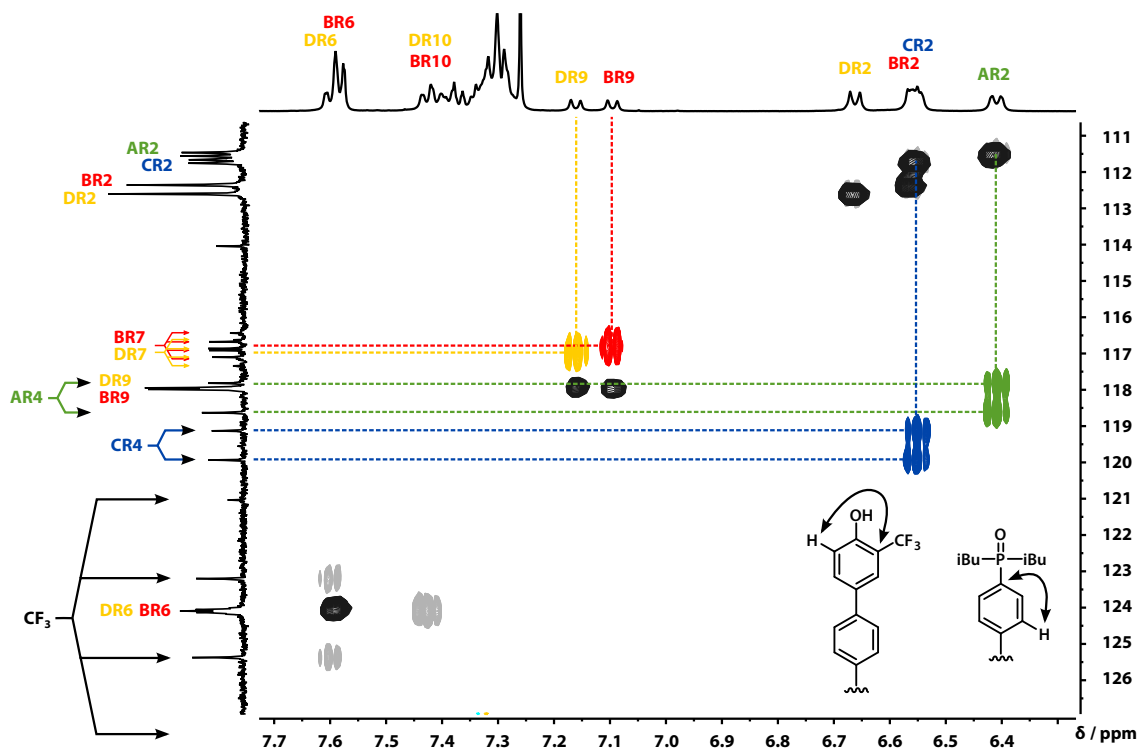

Fig. S6 Overlay of the aromatic regions of the  $^1\text{H}$ - $^{13}\text{C}$  HMBC (500 MHz,  $\text{CDCl}_3$ , 298 K, *ca.* 5 mm, light grey) and  $^1\text{H}$ - $^{13}\text{C}$  HSQC (500 MHz,  $\text{CDCl}_3$ , 298 K, *ca.* 5 mm, dark grey) spectra of the ADAD 4-mer. The substructure shows the highlighted correlations between the signals on the recognition units.

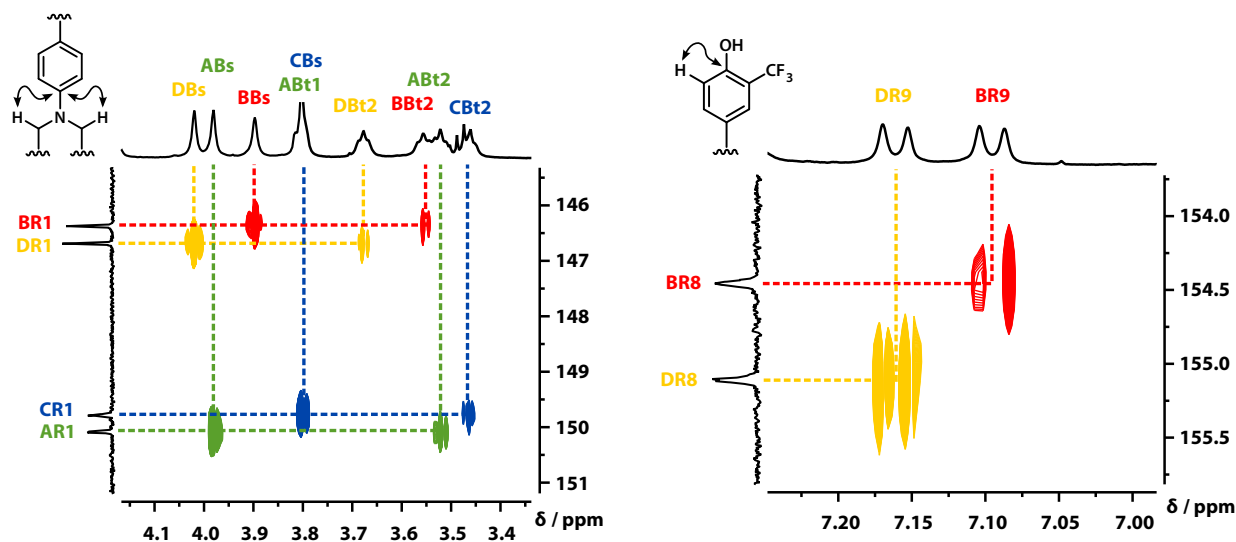

Fig. S7 Aromatic regions of the  $^1\text{H}$ - $^{13}\text{C}$  HMBC (500 MHz,  $\text{CDCl}_3$ , 298 K, *ca.* 5 mm) spectrum of the ADAD 4-mer. The substructure shows the highlighted correlations between the signals on the recognition units.

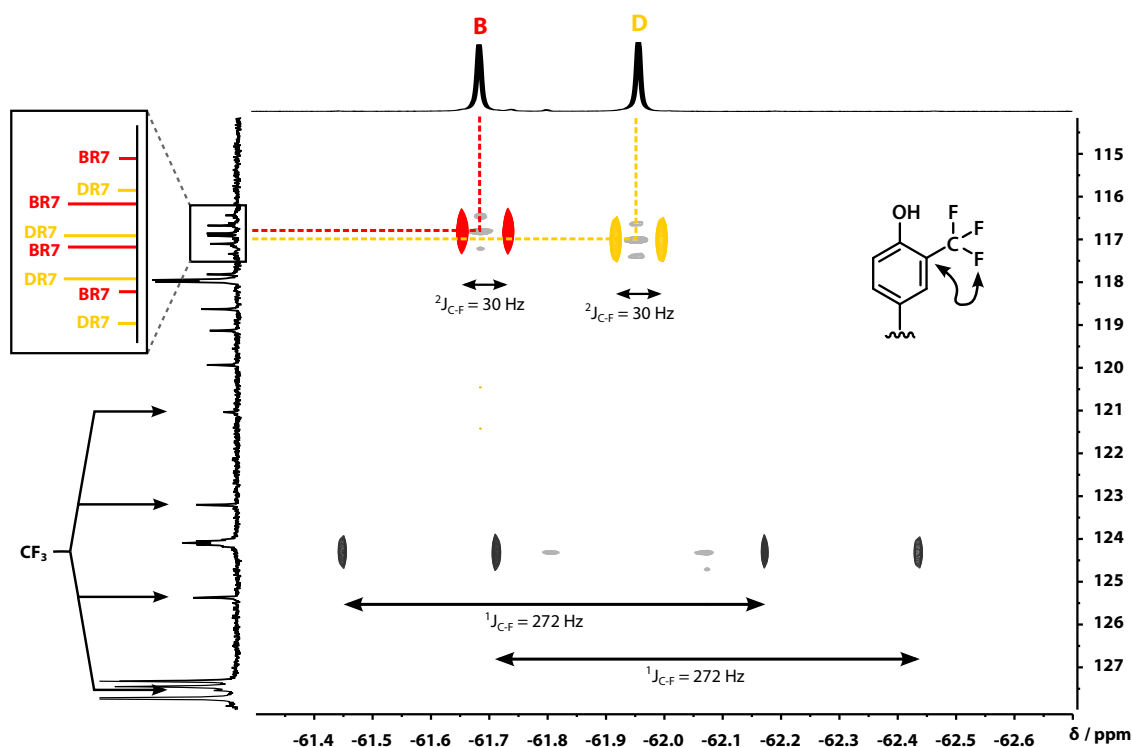

Fig. S8 Overlay of the  $^{19}\text{F}$ - $^{13}\text{C}$  HMBC (400 MHz,  $\text{CDCl}_3$ , 298 K, *ca.* 5 mm, dark grey) and  $^{19}\text{F}$ - $^{13}\text{C}$  HSQC ( $\text{CDCl}_3$ , 298 K, *ca.* 5 mm, light grey) spectra of the ADAD 4-mer. The substructure shows the highlighted correlation between the *ipso* carbon and the fluorine nucleus. One- and two-bond coupling constants are also shown.

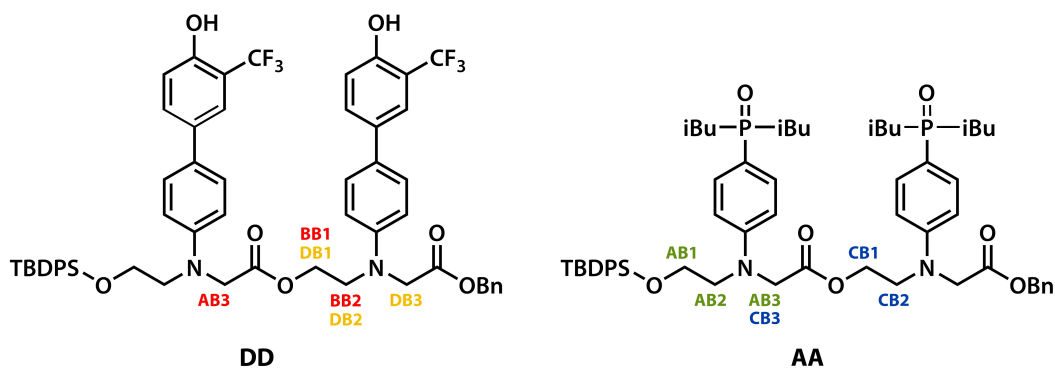

Fig. S9 Structures of AA and DD which cannot form hydrogen bonds and were used as the reference compounds for the backbone chemical shifts. Labelling corresponds to the labels of the equivalent ADAD residues. Unlabelled protons are not equivalent to any ADAD residues.

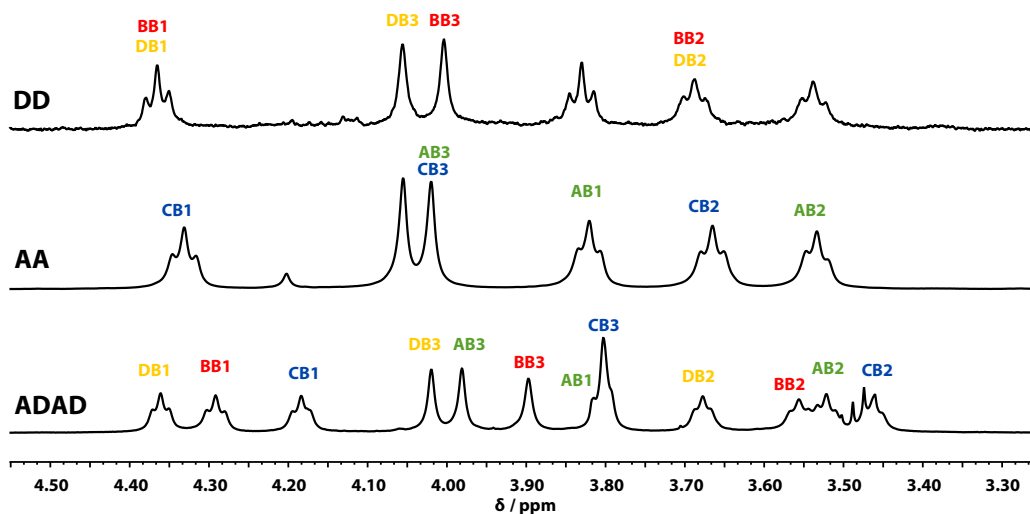

Fig. S10 Aliphatic region of the  $^1\text{H}$  NMR ( $\text{CDCl}_3$ , 298 K) spectra of DD (400 MHz, *ca.* 5 mM), AA (400 MHz, *ca.* 1 mM), and ADAD (500 MHz, *ca.* 5 mM). Signals of the 2-mers are labelled using the corresponding ADAD labels. Unlabelled signals are not equivalent to any ADAD residues.

### 3 Melting experiments: Further Details

#### Two-State Melting Equilibrium

The resulting best fits of the two-state melting isochore to the variable temperature  $^{19}\text{F}$  NMR data are shown in Fig. S11 (a). The  $^{19}\text{F}$  NMR chemical shift of the outer ADAD donor residue in the fully denatured state ( $-57.7$  ppm) is not consistent with the values from the dilution experiments, where the chemical shift for the monomeric AD and the inner residues of monomeric ADAD was around  $-59$  ppm. The chemical shifts of all donor residues in fully assembled dimers of both AD and ADAD converged to the same value of  $-60.8$  ppm, which is consistent with the dilution experiments. Therefore, we decided to fix the values of the complexation-induced limiting chemical shifts in ADAD to be equal to those of AD, but the resulting best-fit isochores (see Figure Fig. S11 (b)) did not model the experimental data well. These results suggest that the simple two-state melting equilibrium does not explain the behaviour of ADAD.

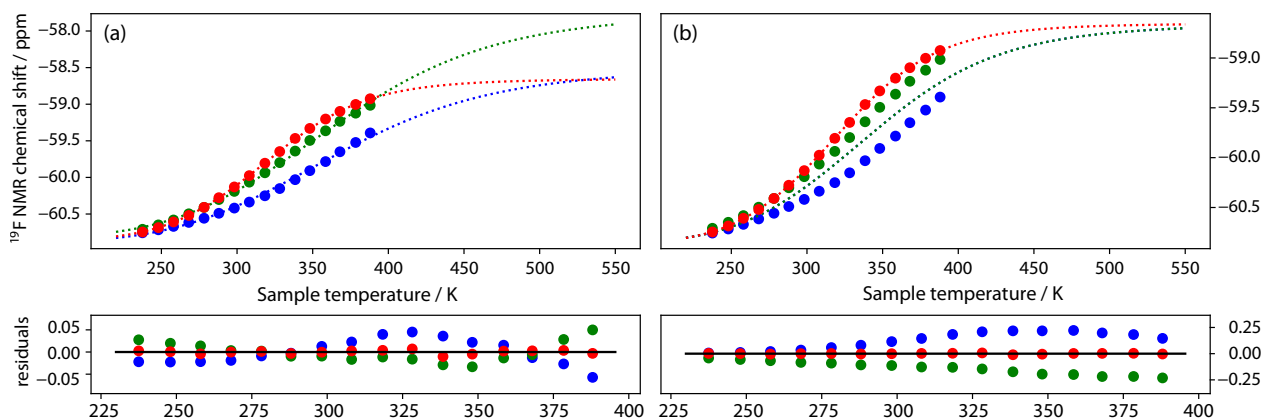

**Fig. S11** Fitting of two-state equilibrium isochores to the  $^{19}\text{F}$  NMR melting experiments of AD (red) and ADAD (outer  $^{19}\text{F}$  green, inner  $^{19}\text{F}$  blue) in TCE. (a) Four-parameters model with no constraints. (b) Monomer and dimer ADAD chemical shifts constrained to those of AD.

#### Three-State Melting Equilibrium

We assumed that the melting of the ADAD dimer proceeds through a highly populated intermediate I, giving a three-state equilibrium:

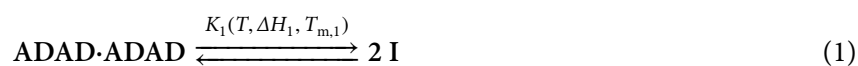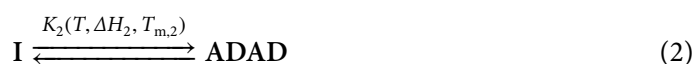

The chemical shifts of the fully bound and fully denatured strands were found to be consistent across all species when no constraints were imposed on the model (see Figure Fig. S12 (a)). In order to reduce the number of model parameters, we fixed the values of the limiting complexation-induced chemical shifts in ADAD to be equal to those of AD. The resulting best-fit isochores are shown in Figure Fig. S12 (b) and the thermodynamic fitting parameters are shown in Table S1. Melting temperatures for the two processes agree with the trends observed in the data. The enthalpy of melting for the intermolecular process  $\Delta H_1$  was found to be comparable with the value for the dissociation of AD, while the observed enthalpy of unfolding  $\Delta H_2$  was unexpectedly large for breaking of one hydrogen bond.

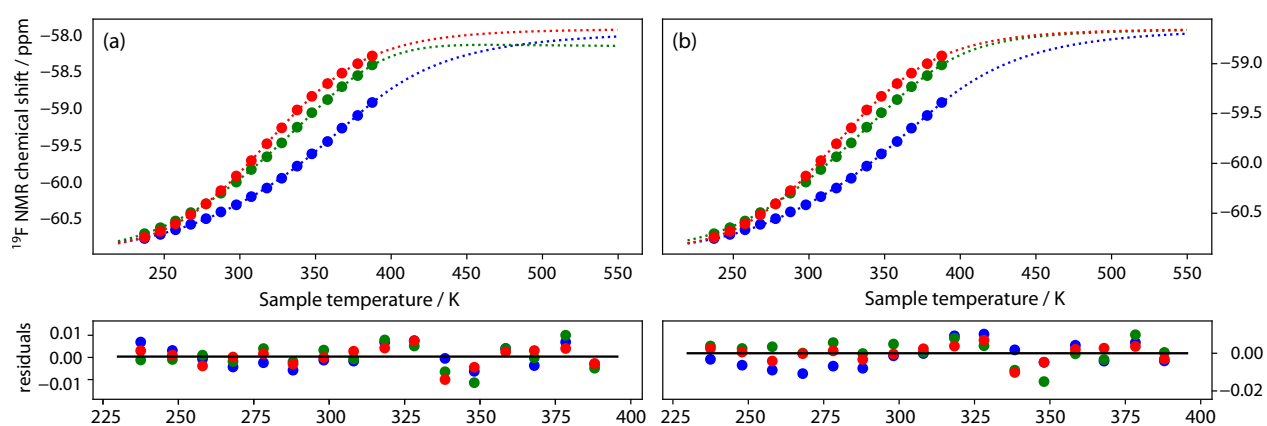

**Fig. S12** Fitting of three-state equilibrium isochores to the  $^{19}\text{F}$  NMR melting experiments of AD (red) and ADAD (outer  $^{19}\text{F}$  green, inner  $^{19}\text{F}$  blue) in TCE. (a) Seven-parameters model with no constraints. (b) Monomer and dimer ADAD chemical shifts constrained to be equal to those of AD.

**Table S1** Thermodynamic parameters from NMR melting experiments on ADAD in TCE- $\text{d}_2$  at 7.4 mM.

| Complex           | $\delta_{\text{kiss}} / \text{ppm}$ | $\delta_{\text{loop}} / \text{ppm}$ | $\delta_{\text{strand}} / \text{ppm}$ | $T_{\text{m},1} / \text{K}$ | $T_{\text{m},2} / \text{K}$ | $\Delta H_1 / \text{kJ mol}^{-1}$ | $\Delta H_2 / \text{kJ mol}^{-1}$ |
|-------------------|-------------------------------------|-------------------------------------|---------------------------------------|-----------------------------|-----------------------------|-----------------------------------|-----------------------------------|
| AD·AD             | -60.9                               | —                                   | -58.7                                 | 321                         | —                           | 38.8                              | —                                 |
| ADAD·ADAD (inner) | -60.9 <sup>§</sup>                  | -58.9                               | -58.7 <sup>§</sup>                    | 324                         | 404                         | 31.4                              | 37.1                              |
| ADAD·ADAD (outer) | -60.9 <sup>§</sup>                  | -59.6                               | -58.7 <sup>§</sup>                    |                             |                             |                                   |                                   |

<sup>§</sup> Parameter values fixed in the non-linear least-squares fit to be equal to the values for AD.

#### 4 Dimerisation Isotherm Derivation and Implementation

Equilibrium constant  $K_{M\cdot M}$  the dimerisation of a self-complementary monomer  $M$  to form  $M\cdot M$  is:

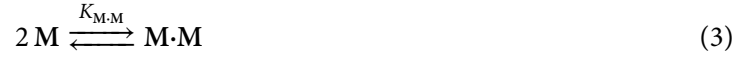

$$K_{M\cdot M} = \frac{[M\cdot M]}{[M]^2} \quad (4)$$

where  $[M]$  and  $[M\cdot M]$ , are the equilibrium concentrations of the free monomer and the dimer. Assuming that no other equilibria occur in the mixture, the total concentration of the dimerising molecule  $[M]_0$  is simply:

$$[M]_0 = [M] + 2[M\cdot M] \quad (5)$$

Hence, the equilibrium constant  $K_{M\cdot M}$  can alternatively expressed as:

$$K_{M\cdot M} = \frac{[M\cdot M]}{([M]_0 - 2[M\cdot M])^2} \quad (6)$$

which can be easily rearranged to give a quadratic in  $[M\cdot M]$ :

$$[M\cdot M]^2 - [M\cdot M] \left( [M]_0 + \frac{1}{4K_{M\cdot M}} \right) + \frac{1}{4}[M]_0^2 = 0 \quad (7)$$

Equation 7 has only one physically meaningful root:

$$[M\cdot M] = \frac{1}{2} \left( [M]_0 + \frac{1}{4K_{M\cdot M}} \right) - \frac{1}{2} \sqrt{\left( [M]_0 + \frac{1}{4K_{M\cdot M}} \right)^2 - [M]_0^2} \quad (8)$$

which gives the molar fraction of the dimer  $\chi_{M\cdot M}$  as:

$$\chi_{M\cdot M} = \frac{2[M\cdot M]}{[M]_0} = 1 + \frac{1}{4[M]_0 K_{M\cdot M}} - \sqrt{\left( 1 + \frac{1}{4[M]_0 K_{M\cdot M}} \right)^2 - 1} \quad (9)$$

In the fast-exchange regime of NMR spectroscopy, the observed chemical shift  $\delta_{\text{obs}}$  is a weighted average of the signals arising from all species present in solution:

$$\delta_{\text{obs}} = \delta_M \frac{[M]}{[M]_0} + \delta_{M\cdot M} \frac{2[M\cdot M]}{[M]_0} = \delta_M(1 - \chi_{M\cdot M}) + \delta_{M\cdot M}\chi_{M\cdot M} \quad (10)$$



where  $\delta_M$  and  $\delta_{M-M}$  are the chemical shifts corresponding to the free M and the fully bound M-M complex, respectively. A model defined by Equations (9) and (10) can be fitted to the NMR data with  $K_{M-M}$ ,  $\delta_{M-M}$ , and  $\delta_M$  as parameters, using `lmfit` package in Python.<sup>2</sup>

Values in the text are quoted as arithmetic means and the errors were estimated as 95% confidence intervals based on at least two repetitions.

```

1 # FITTING DIMERISATION ISOTHERM TO NMR DILUTION DATA
2 # Non-linear regression done using lmfit
3 # https://lmfit.github.io/lmfit-py/model.html
4
5 from lmfit import Parameters, Model
6
7 # Define model parameters with initial values
8 # add with tuples: (NAME VALUE VARY MIN MAX EXPR BRUTE_STEP)
9
10 params = Parameters()
11 params.add_many (('K', 100, True, None, None, None, None),
12                 ('d_bound', -70, True, None, None, None, None),
13                 ('d_free', -50, True, None, None, None, None))
14
15 # Molar fraction from the two-state dimerisation equilibrium
16
17 def alpha(c, K):
18     return (1 + 1/(4*K*c) - np.sqrt((1 + 1/(4*K*c))*(1 + 1/(4*K*c)) - 1))
19
20 # MODEL FUNCTION: Observed chemical shift (weighted average)
21
22 def d_obs(c, K, d_bound, d_free):
23     return d_bound * alpha(c, K) + d_free * (1 - alpha(c,K))
24
25 # Fitting parameters to the data
26 # xvalues : dataframe containing total concentration (M)
27 # yvalues : dataframe containing observed chemical shifts (ppm)
28 # List of minimisation methods: https://lmfit.github.io/lmfit-py/fitting.html
29 # Default minimisation method='leastsq' is Levenberg-Marquardt algorithm
30 # Here by default use robust Nelder-Mead method
31 # and then estimate confidence interval from L-M covariance matrix
32 # results : contains best fit parameters
33
34 model = Model(d_obs)
35 results = model.fit(yvalues, params, c=xvalues, method='nelder')
36 results2 = model.fit(yvalues, params=results.params, c=xvalues, method='leastsq')
37
38 # Print best fit parameters and fit statistics
39
40 print(results.fit_report() + '\n' + results2.fit_report())

```

#### 4.1 AD Dimerisation Isotherm in Chloroform - Repetition 1

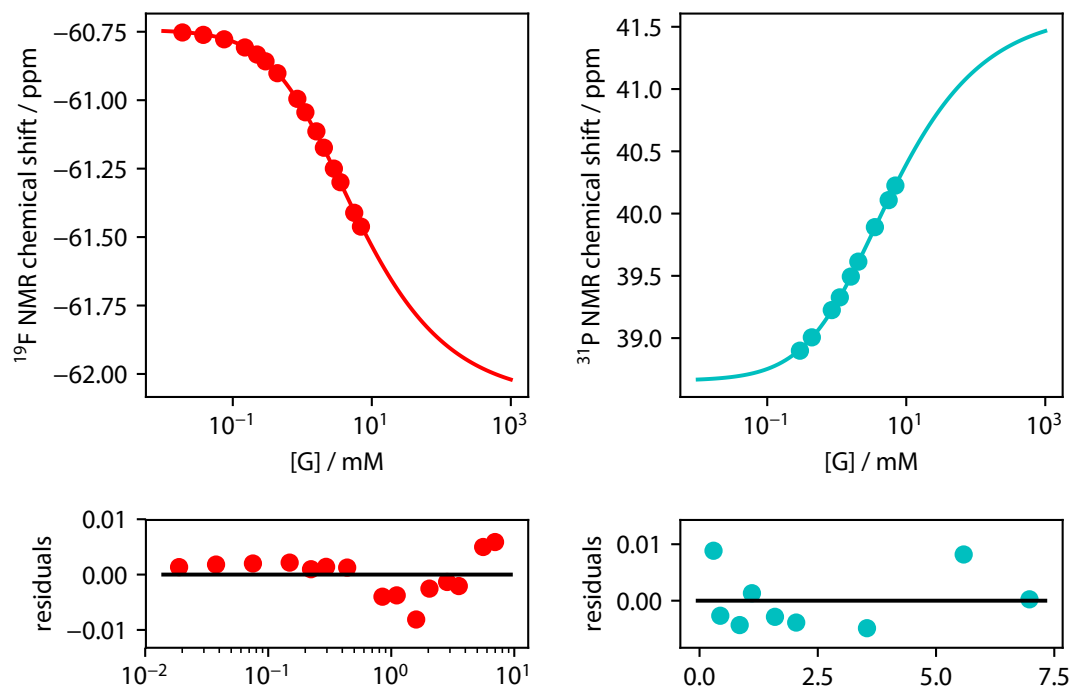

Fig. S13 Best fit dimerisation isotherm for AD chloroform-d at 298 K against the original data.

```

[[Fit Statistics]]
# fitting method      = leastsq
# function evals      = 7
# data points         = 24
# variables           = 5
chi-square            = 4.0579e-04
reduced chi-square    = 2.1358e-05
Akaike info crit     = -253.705261
Bayesian info crit   = -247.814992

[[Variables]]
K:                    170.751051 +/- 3.87320408 (2.27%) (init = 170.7511)
d_freeP1:             38.6571557 +/- 0.00653719 (0.02%) (init = 38.65716)
d_freeF1:             -60.7426747 +/- 0.00218359 (0.00%) (init = -60.74267)
d_boundP1:            41.6223575 +/- 0.02004244 (0.05%) (init = 41.62236)
d_boundF1:            -62.0914041 +/- 0.01230236 (0.02%) (init = -62.0914)

[[Correlations]] (unreported correlations are < 0.100)
C(K, d_boundP1)       = -0.929
C(K, d_boundF1)       = 0.894
C(K, d_freeP1)        = -0.853
C(d_boundP1, d_boundF1) = -0.830
C(d_freeP1, d_boundF1) = -0.762
C(d_freeP1, d_boundP1) = 0.641
C(K, d_freeF1)        = 0.507
C(d_freeF1, d_boundP1) = -0.471
C(d_freeP1, d_freeF1) = -0.433
C(d_freeF1, d_boundF1) = 0.214

```

## AD Dimerisation Isotherm in Chloroform - Repetition 2

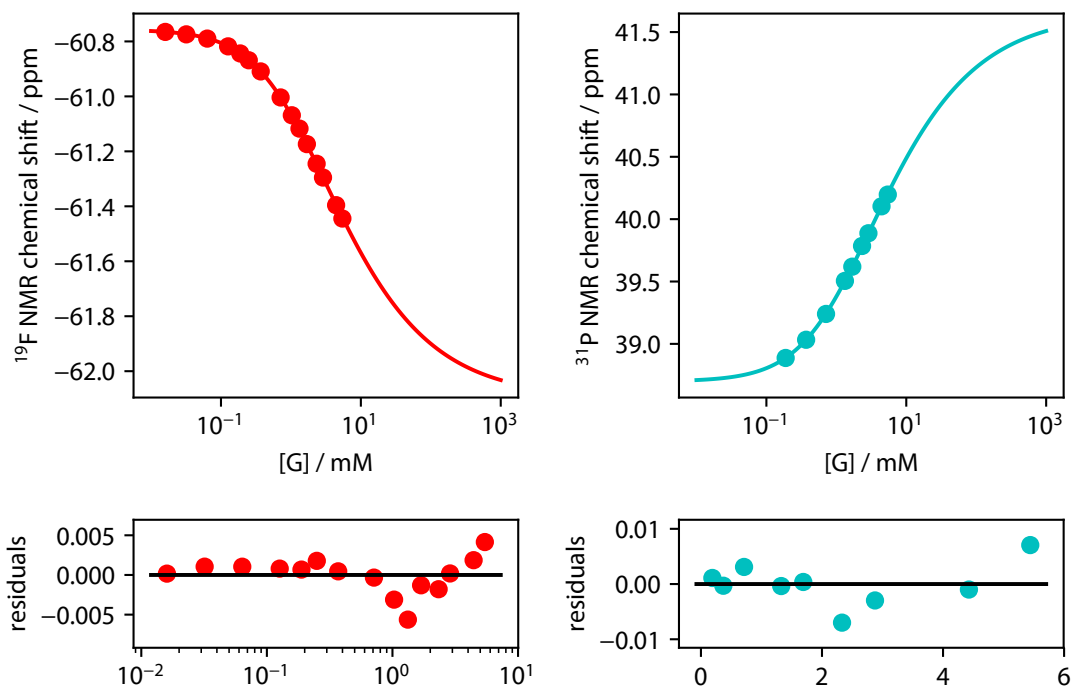

Fig. S14 Best fit dimerisation isotherm for AD chloroform-d at 298 K against the original data.

```

[[Fit Statistics]]
# fitting method      = leastsq
# function evals      = 7
# data points         = 24
# variables           = 5
chi-square            = 1.9344e-04
reduced chi-square    = 1.0181e-05
Akaike info crit     = -271.486881
Bayesian info crit   = -265.596612

[[Variables]]
K:                    194.406549 +/- 3.08573494 (1.59%) (init = 194.4065)
d_freeP1:             38.6983112 +/- 0.00407552 (0.01%) (init = 38.69831)
d_freeF1:             -60.7569883 +/- 0.00149070 (0.00%) (init = -60.75699)
d_boundP1:            41.6546294 +/- 0.01531812 (0.04%) (init = 41.65463)
d_boundF1:            -62.0986771 +/- 0.00891236 (0.01%) (init = -62.09868)

[[Correlations]] (unreported correlations are < 0.100)
C(K, d_boundP1)      = -0.941
C(K, d_boundF1)      = 0.895
C(d_boundP1, d_boundF1) = -0.843
C(K, d_freeP1)       = -0.805
C(d_freeP1, d_boundF1) = -0.721
C(d_freeP1, d_boundP1) = 0.599
C(K, d_freeF1)       = 0.485
C(d_freeF1, d_boundP1) = -0.456
C(d_freeP1, d_freeF1) = -0.390
C(d_freeF1, d_boundF1) = 0.190

```

## 4.2 ADAD Dimerisation Isotherm in Chloroform - Repetition 1

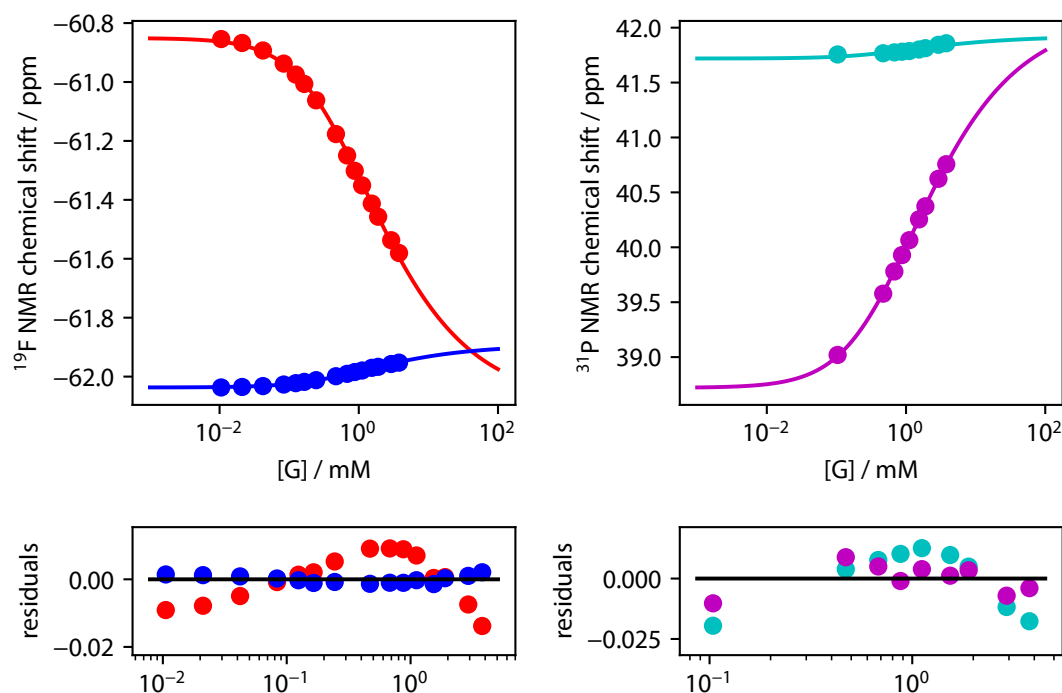

Fig. S15 Best fit dimerisation isotherm for ADAD chloroform-d at 298 K against the original data.

```

[[Fit Statistics]]
# fitting method      = leastsq
# function evals      = 11
# data points         = 48
# variables           = 9
chi-square            = 0.00235235
reduced chi-square    = 6.0317e-05
Akaike info crit     = -458.329984
Bayesian info crit   = -441.489175

[[Variables]]
K:                    488.092215 +/- 14.3160988 (2.93%) (init = 488.0922)
d_freeP1:             41.7192611 +/- 0.00720932 (0.02%) (init = 41.71926)
d_freeF1:             -60.8507328 +/- 0.00377699 (0.01%) (init = -60.85073)
d_freeP2:             38.7203650 +/- 0.01242313 (0.03%) (init = 38.72036)
d_freeF2:             -62.0368213 +/- 0.00335155 (0.01%) (init = -62.03682)
d_boundP1:           41.9217981 +/- 0.01093760 (0.03%) (init = 41.9218)
d_boundF1:           -62.0945051 +/- 0.01350667 (0.02%) (init = -62.09451)
d_boundP2:           42.1200140 +/- 0.02564677 (0.06%) (init = 42.12001)
d_boundF2:           -61.8924296 +/- 0.00788421 (0.01%) (init = -61.89243)

[[Correlations]] (unreported correlations are < 0.100)
C(K, d_boundP2)      = -0.906
C(K, d_boundF1)      = 0.817
C(K, d_freeP2)       = -0.816
C(d_freeP1, d_boundP1) = -0.800
C(d_boundF1, d_boundP2) = -0.741
C(d_freeP2, d_boundF1) = -0.667
C(d_freeF2, d_boundF2) = -0.600

```

C(d\_freeP2, d\_boundP2) = 0.539  
C(K, d\_freeF1) = 0.464  
C(d\_freeF1, d\_boundP2) = -0.421  
C(d\_freeF1, d\_freeP2) = -0.379  
C(K, d\_boundF2) = -0.163  
C(d\_boundP2, d\_boundF2) = 0.147  
C(d\_boundF1, d\_boundF2) = -0.133  
C(d\_freeP2, d\_boundF2) = 0.133  
C(K, d\_boundP1) = -0.127  
C(d\_boundP1, d\_boundP2) = 0.115  
C(d\_boundP1, d\_boundF1) = -0.103  
C(d\_freeP2, d\_boundP1) = 0.103

## ADAD Dimerisation Isotherm in Chloroform - Repetition 2

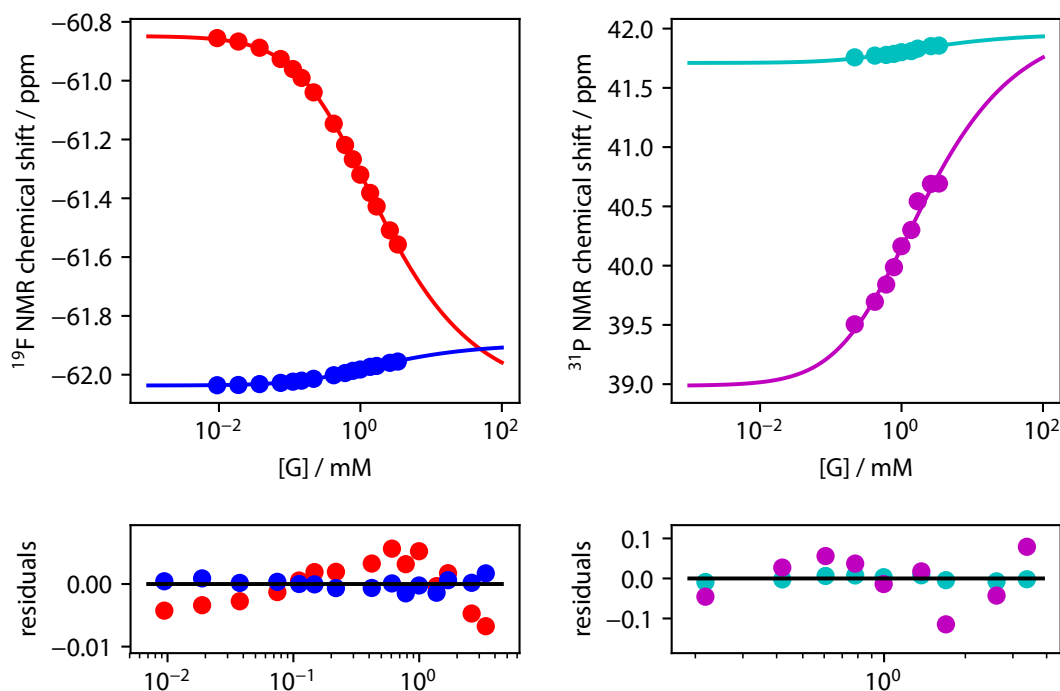

Fig. S16 Best fit dimerisation isotherm for ADAD chloroform-d at 298 K against the original data.

```

[[Fit Statistics]]
# fitting method      = leastsq
# function evals      = 31
# data points         = 48
# variables           = 9
chi-square            = 0.02959961
reduced chi-square    = 7.5896e-04
Akaike info crit     = -336.777371
Bayesian info crit   = -319.936562

[[Variables]]
K:                    495.830100 +/- 73.8830006 (14.90%) (init = 484.9741)
d_freeP1:             41.7102884 +/- 0.02846814 (0.07%) (init = 41.71096)
d_freeF1:             -60.8481837 +/- 0.01435614 (0.02%) (init = -60.84942)
d_freeP2:             38.9861245 +/- 0.06450579 (0.17%) (init = 38.99468)
d_freeF2:             -62.0366674 +/- 0.01177332 (0.02%) (init = -62.03652)
d_boundP1:           41.9579335 +/- 0.04448221 (0.11%) (init = 41.95911)
d_boundF1:           -62.0758085 +/- 0.06439811 (0.10%) (init = -62.08438)
d_boundP2:           42.0497488 +/- 0.10360027 (0.25%) (init = 42.06384)
d_boundF2:           -61.8941770 +/- 0.02943287 (0.05%) (init = -61.89318)

[[Correlations]] (unreported correlations are < 0.100)
C(K, d_boundP2)      = -0.906
C(K, d_freeP2)       = -0.900
C(K, d_boundF1)     = 0.895
C(d_boundF1, d_boundP2) = -0.811
C(d_freeP2, d_boundF1) = -0.806
C(d_freeP1, d_boundP1) = -0.803
C(d_freeP2, d_boundP2) = 0.658
  
```

C(d\_freeF2, d\_boundF2) = -0.583  
C(K, d\_freeF1) = 0.576  
C(d\_freeF1, d\_boundP2) = -0.522  
C(d\_freeF1, d\_freeP2) = -0.519  
C(d\_freeF1, d\_boundF1) = 0.290  
C(K, d\_boundF2) = -0.227  
C(d\_boundP2, d\_boundF2) = 0.206  
C(d\_freeP2, d\_boundF2) = 0.205  
C(d\_boundF1, d\_boundF2) = -0.204  
C(K, d\_boundP1) = -0.171  
C(K, d\_freeP1) = -0.165  
C(d\_boundP1, d\_boundP2) = 0.155  
C(d\_freeP2, d\_boundP1) = 0.154  
C(d\_boundP1, d\_boundF1) = -0.153  
C(d\_freeP1, d\_boundP2) = 0.149  
C(d\_freeP1, d\_freeP2) = 0.148  
C(d\_freeP1, d\_boundF1) = -0.148  
C(d\_freeF1, d\_boundF2) = -0.131

### 4.3 AD Dimerisation Isotherm in TCE - Repetition 1

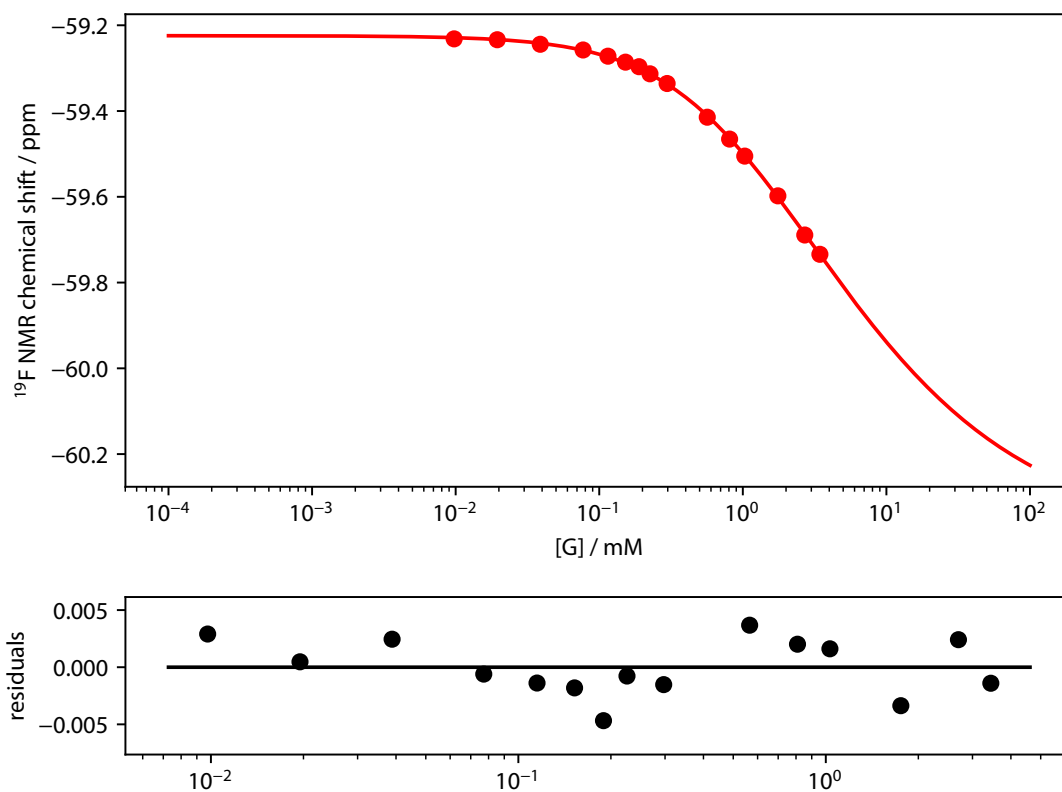

Fig. S17 Best fit dimerisation isotherm for AD TCE- $\text{d}_2$  at 298 K against the original data.

```
[[Model]]
  Model(d_obs)
[[Fit Statistics]]
  # fitting method = leastsq
  # function evals = 5
  # data points   = 15
  # variables     = 3
  chi-square      = 8.4285e-05
  reduced chi-square = 7.0237e-06
  Akaike info crit = -175.340371
  Bayesian info crit = -173.216220
[[Variables]]
  K:      198.493145 +/- 6.40093251 (3.22%) (init = 198.4932)
  d_bound: -60.3982722 +/- 0.01701657 (0.03%) (init = -60.39827)
  d_free:  -59.2242828 +/- 0.00134973 (0.00%) (init = -59.22428)
[[Correlations]] (unreported correlations are < 0.100)
  C(K, d_bound)      = 0.968
  C(K, d_free)       = 0.688
  C(d_bound, d_free) = 0.558
```



## AD Dimerisation Isotherm in TCE - Repetition 2

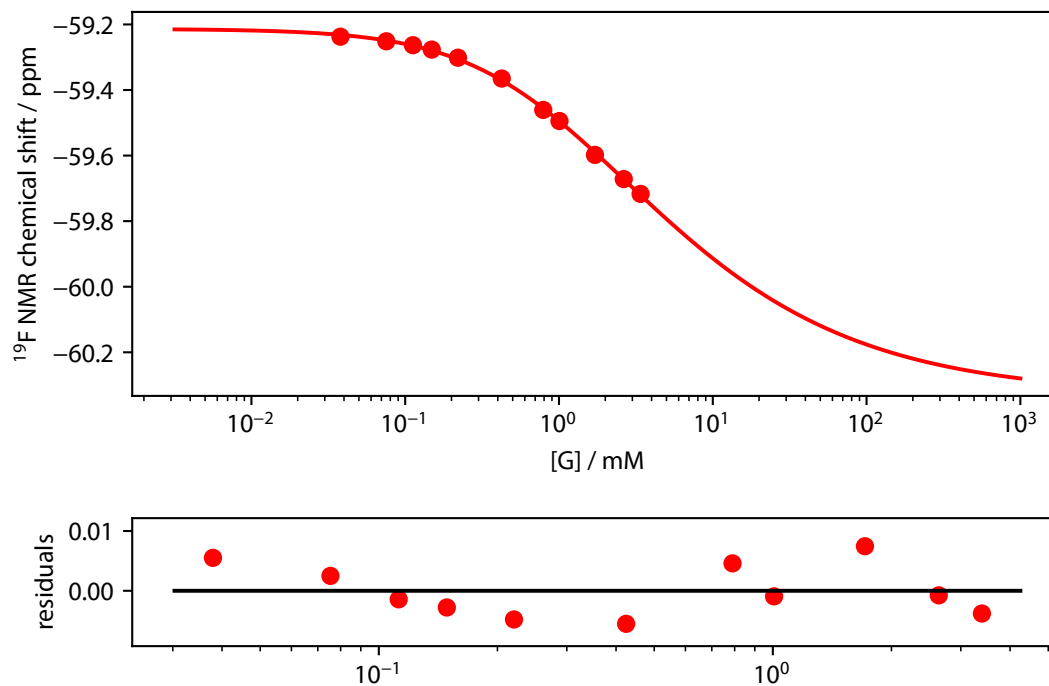

Fig. S18 Best fit dimerisation isotherm for AD TCE- $\text{d}_2$  at 298 K against the original data.

```

[[Fit Statistics]]
# fitting method = leastsq
# function evals = 5
# data points = 11
# variables = 3
chi-square = 1.9244e-04
reduced chi-square = 2.4055e-05
Akaike info crit = -114.489807
Bayesian info crit = -113.296122
[[Variables]]
K: 224.029446 +/- 15.9937148 (7.14%) (init = 224.0292)
d_freeF1: -59.2135095 +/- 0.00355377 (0.01%) (init = -59.21351)
d_boundF1: -60.3313485 +/- 0.03282292 (0.05%) (init = -60.33135)
[[Correlations]] (unreported correlations are < 0.100)
C(K, d_boundF1) = 0.969
C(K, d_freeF1) = 0.751
C(d_freeF1, d_boundF1) = 0.622

```

#### 4.4 ADAD Dimerisation Isotherm in TCE - Repetition 1

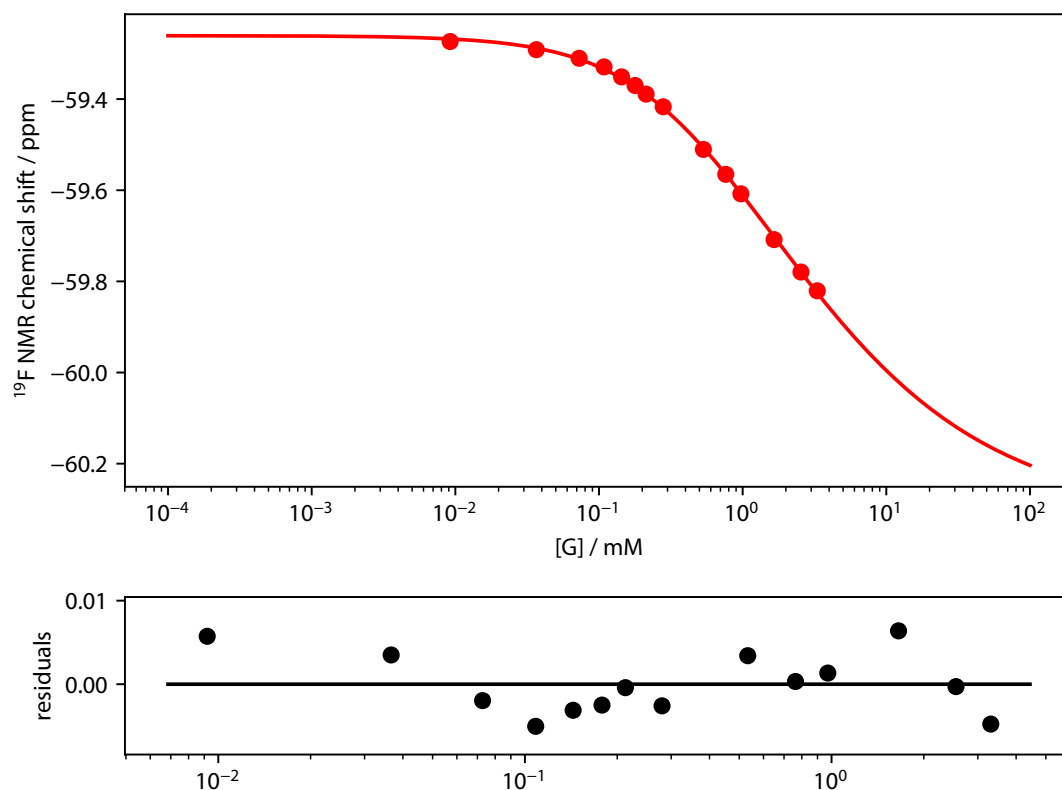

Fig. S19 Best fit dimerisation isotherm for ADAD TCE- $\text{d}_2$  at 298 K against the original data.

```
[[Model]]
  Model(d_obs)
[[Fit Statistics]]
  # fitting method = leastsq
  # function evals = 5
  # data points   = 14
  # variables     = 3
  chi-square      = 1.7440e-04
  reduced chi-square = 1.5855e-05
  Akaike info crit = -152.104651
  Bayesian info crit = -150.187479
[[Variables]]
  K:      370.076582 +/- 15.6088765 (4.22%) (init = 370.0765)
  d_bound: -60.3197208 +/- 0.01598141 (0.03%) (init = -60.31972)
  d_free:  -59.2608510 +/- 0.00258315 (0.00%) (init = -59.26085)
[[Correlations]] (unreported correlations are < 0.100)
  C(K, d_bound)      = 0.948
  C(K, d_free)       = 0.760
  C(d_bound, d_free) = 0.592
```

## ADAD Dimerisation Isotherm in TCE - Repetition 2

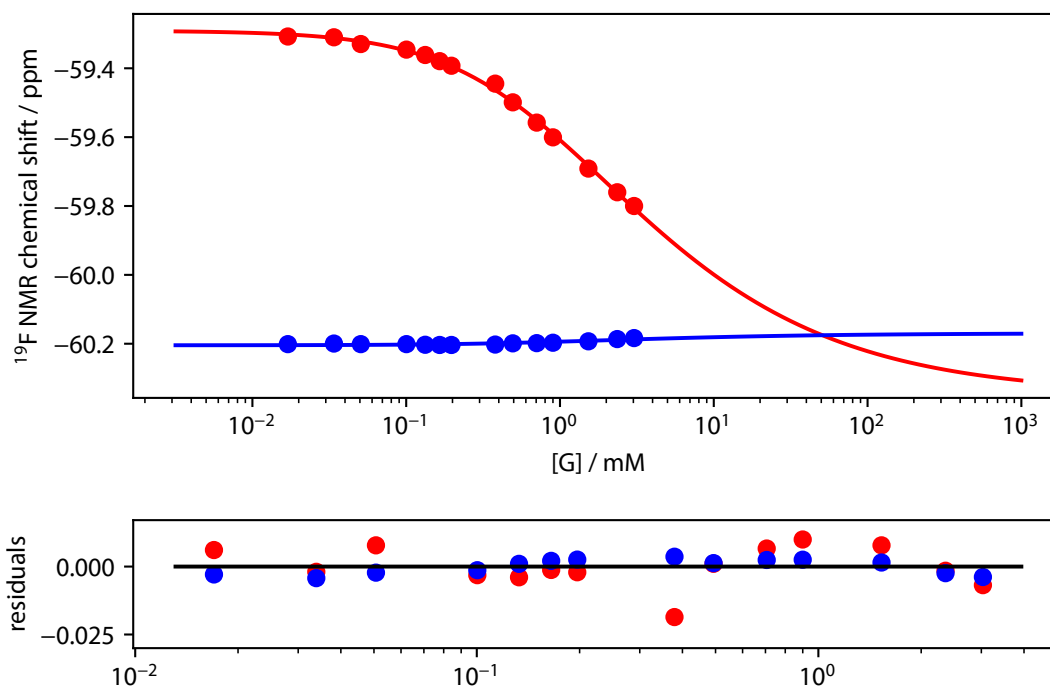

Fig. S20 Best fit dimerisation isotherm for ADAD TCE-d<sub>2</sub> at 298 K against the original data.

```

[[Fit Statistics]]
# fitting method      = leastsq
# function evals      = 38
# data points         = 28
# variables           = 5
chi-square            = 8.2846e-04
reduced chi-square    = 3.6020e-05
Akaike info crit     = -281.988120
Bayesian info crit   = -275.327098
[[Variables]]
K:                   306.798818 +/- 21.6241378 (7.05%) (init = 147.7316)
d_freeF2:            -60.2044593 +/- 0.00247974 (0.00%) (init = -60.20388)
d_freeF1:            -59.2908028 +/- 0.00363780 (0.01%) (init = -59.31508)
d_boundF2:          -60.1695750 +/- 0.00864069 (0.01%) (init = -60.15501)
d_boundF1:          -60.3484897 +/- 0.02968463 (0.05%) (init = -60.73865)
[[Correlations]] (unreported correlations are < 0.100)
C(K, d_boundF1)      = 0.957
C(K, d_freeF1)       = 0.732
C(d_freeF2, d_boundF2) = -0.620
C(d_freeF1, d_boundF1) = 0.577
C(K, d_boundF2)      = -0.108
C(d_boundF2, d_boundF1) = -0.104

```

## 5 Two-State Melting Isochore Derivation and Implementation

For a two-state melting equilibrium of a dimeric  $M \cdot M$  into a self-complementary monomer  $M$ :

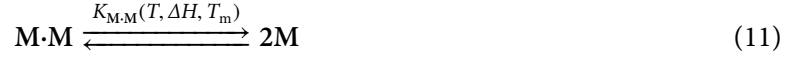

the molar fractions for each species at a given temperature  $T$  are:

$$\chi_{M \cdot M}(T) = \frac{2[M \cdot M](T)}{[M]_0} \quad (12)$$

$$\chi_M(T) = \frac{[M](T)}{[M]_0} = 1 - \chi_{M \cdot M}(T) \quad (13)$$

where  $[M]_0$  is the total concentration of  $M$  in all forms. The equilibrium constant for the melting reaction at temperature  $T$  can be written in terms of the molar fraction of the dimer as:

$$K(T) = \frac{[M]^2(T)}{[M \cdot M](T)} = \frac{2[M]_0(1 - \chi_{M \cdot M}(T))^2}{\chi_{M \cdot M}(T)} \quad (14)$$

Differentiating the reaction isotherm equation ( $\Delta G = -RT \ln K$ ) with respect to  $T^{-1}$ , under the assumption that  $\Delta H$  and  $\Delta S$  are independent of temperature, yields the van't Hoff equation:

$$\frac{d \ln K(T)}{d(1/T)} = -\frac{\Delta H}{R} \quad (15)$$

Integrating Equation (15) between a range of temperatures  $T_1$  and  $T_2$  gives:

$$\ln \frac{K(T_1)}{K(T_2)} = -\frac{\Delta H}{R} \left( \frac{1}{T_1} - \frac{1}{T_2} \right) \quad (16)$$

$$K(T_1) = K(T_2) \exp \left\{ -\frac{\Delta H}{R} \left( \frac{1}{T_1} - \frac{1}{T_2} \right) \right\} \quad (17)$$

At the melting temperature  $T_m$ , half of  $M$  exists as  $M \cdot M$  and hence  $\chi_{M \cdot M}(T_m) = \chi_M(T_m) = 0.5$ :

$$K(T_m) = \frac{2 \times (1 - 0.5)^2 \times [M]_0}{0.5} = [M]_0 \quad (18)$$

which provides the dimerisation melting isochore:

$$K(T) = \frac{1}{[M]_0} \exp \left\{ -\frac{\Delta H}{R} \left( \frac{1}{T} - \frac{1}{T_m} \right) \right\} \quad (19)$$

The observed chemical shift  $\delta_{\text{obs}}$  is a weighted average for all species in fast exchange:

$$\delta_{\text{obs}}(T) = \delta_M \chi_M(T) + \delta_{M \cdot M} \chi_{M \cdot M}(T) \quad (20)$$

which can be combined with Equation (13) to yield:

$$\delta_{\text{obs}}(T) = \delta_M (1 - \chi_{M \cdot M}(T)) + \delta_{M \cdot M} \chi_{M \cdot M}(T) \quad (21)$$

Following standard dimerisation argument (see Subsection 4),  $\chi_{M \cdot M}(T)$  can be expressed as:<sup>3</sup>

$$\chi_{M \cdot M} = \frac{2[M \cdot M](T)}{[M]_0} = 1 + \frac{K_{M \cdot M}(T)}{4[M]_0} - \sqrt{\left( 1 + \frac{K_{M \cdot M}(T)}{4[M]_0} \right)^2 - 1} \quad (22)$$

A model defined by Equations (19), (21), and (22) can then fitted to the data obtained from a variable temperature  $^{19}\text{F}$  experiment with  $\Delta H$ ,  $T_m$ ,  $\delta_{M \cdot M}$ , and  $\delta_M$  as parameters, using **lmfit** package in Python.<sup>2</sup> Analysis was performed in Jupyter and the results were plotted using **matplotlib**.<sup>4,5</sup>

```

1 # FITTING TWO-STATE ISOCHORE TO VT NMR DATA
2 # Non-linear regression done using lmfit
3 # https://lmfit.github.io/lmfit-py/model.html
4
5 from lmfit import Parameters, Model
6 import numpy as np
7 import pandas as pd
8
9 # Define model parameters with initial values
10 # c : float containing total concentration (M)
11 # R : universal gas constant (J / mol K)
12
13 c = 0.00744
14 R = 8.314
15
16 params = Parameters()
17 params.add_many(('dH', 38800, True, None, None, None, None),
18                ('Tm', 298, True, None, None, None, None),
19                ('d_bound', -60.860, True, None, None, None, None),
20                ('d_free', -58.653, True, None, None, None, None))
21
22 # Equilibrium constant from integrated van't Hoff equation
23
24 def K(T, dH, Tm):
25     return c * np.exp(-dH/R*(1/T-1/Tm))
26
27 # Molar fraction from two-state equilibrium constant
28
29 def alpha(T, dH, Tm):
30     return (4*c + K(T, dH, Tm) - np.sqrt((4*c + K(T, dH, Tm))* \
31                (4*c + K(T, dH, Tm)) - 16*c*c))/(4*c)
32
33 # MODEL FUNCTION: Observed chemical shift (weighted average)
34
35 def d_obs(T, dH, Tm, d_bound, d_free):
36     return alpha(T, dH, Tm)*d_bound + (1-alpha(T, dH, Tm))*d_free
37
38 # Fitting parameters to the data
39 # T : dataframe containing sample temperatures (K)
40 # d_F : dataframe containing observed chemical shifts (ppm)
41 # results : contains best fit parameters
42
43 model = Model(d_obs)
44 results = model.fit(d_F, params, T=T, method='nelder')
45 results2 = model.fit(d_F, results.params, T=T, method='leastsq')
46
47 print(results.fit_report() + '\n' + results2.fit_report())

```

## 5.1 AD Two-State Melting Isochore

```
[[Model]]
  Model(d_obs)
[[Fit Statistics]]
  # fitting method    = leastsq
  # function evals    = 6
  # data points       = 16
  # variables         = 4
  chi-square          = 2.6534e-04
  reduced chi-square  = 2.2111e-05
  Akaike info crit    = -168.113666
  Bayesian info crit  = -165.023311
[[Variables]]
  dH:      38863.2239 +/- 474.119538 (1.22%) (init = 38863.23)
  Tm:      321.141995 +/- 0.39350863 (0.12%) (init = 321.142)
  d_bound: -60.8600436 +/- 0.00690686 (0.01%) (init = -60.86004)
  d_free:  -58.6528140 +/- 0.01417487 (0.02%) (init = -58.65281)
[[Correlations]] (unreported correlations are < 0.100)
  C(dH, d_bound)      = 0.892
  C(dH, d_free)       = -0.890
  C(Tm, d_free)       = 0.816
  C(d_bound, d_free)  = -0.692
  C(dH, Tm)           = -0.514
  C(Tm, d_bound)      = -0.186
```

## 5.2 ADAD Two-State Melting Isochore - No Constraints

```
[[Fit Statistics]]
# fitting method   = leastsq
# function evals   = 7
# data points      = 32
# variables        = 6
chi-square         = 0.02004218
reduced chi-square = 7.7085e-04
Akaike info crit   = -224.020872
Bayesian info crit = -215.226456
[[Variables]]
dH:      -30948.6036 +/- 3012.73807 (9.73%) (init = -30948.6)
Tm:      365.659008 +/- 16.0296604 (4.38%) (init = 365.659)
d_bound1: -60.8846915 +/- 0.03514270 (0.06%) (init = -60.88469)
d_free1:  -58.4917865 +/- 0.37601474 (0.64%) (init = -58.49179)
d_bound2: -60.8178828 +/- 0.04410058 (0.07%) (init = -60.81788)
d_free2:  -57.7287867 +/- 0.48485168 (0.84%) (init = -57.72879)
[[Correlations]] (unreported correlations are < 0.100)
C(Tm, d_free2)      = 0.997
C(Tm, d_free1)      = 0.996
C(d_free1, d_free2) = 0.995
C(dH, d_free2)      = 0.949
C(dH, d_free1)      = 0.948
C(dH, Tm)           = 0.937
C(dH, d_bound2)     = -0.918
C(dH, d_bound1)     = -0.892
C(d_bound1, d_bound2) = 0.887
C(d_bound2, d_free2) = -0.802
C(d_free1, d_bound2) = -0.789
C(d_bound1, d_free1) = -0.786
C(d_bound1, d_free2) = -0.768
C(Tm, d_bound2)     = -0.767
C(Tm, d_bound1)     = -0.745
```



### 5.3 ADAD Two-State Melting Isochore - Limiting Shifts Constrained

```
[[Fit Statistics]]
# fitting method   = leastsq
# function evals   = 3
# data points     = 32
# variables       = 2
chi-square        = 0.71967752
reduced chi-square = 0.02398925
Akaike info crit  = -117.430015
Bayesian info crit = -114.498543
[[Variables]]
dH:      -33777.6504 +/- 2705.75829 (8.01%) (init = -33777.65)
Tm:      342.835185 +/- 2.85285341 (0.83%) (init = 342.8352)
d_bound1: -60.86 (fixed)
d_free1:  -58.6528 (fixed)
d_bound2: -60.86 (fixed)
d_free2:  -58.6528 (fixed)
```

## 6 Three-State Melting Isochore Derivation and Implementation

Alternatively, melting might proceed through an intermediate  $M^*$ , giving a three-state equilibrium:

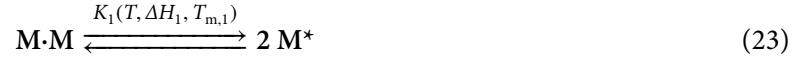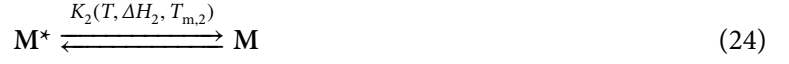

where the molecular fractions of each species are:

$$\chi_{M \cdot M}(T) = \frac{2[M \cdot M](T)}{M_0} \quad (25)$$

$$\chi_{M^*}(T) = \frac{[M^*](T)}{M_0} \quad (26)$$

$$\chi_M(T) = \frac{[M](T)}{M_0} \quad (27)$$

Equilibrium constants for the above equilibria can be expressed in terms of the molar fractions as:

$$K_1(T) = \frac{[M^*]^2(T)}{[M \cdot M](T)} = \frac{2\chi_{M^*}^2(T)[M]_0}{\chi_{M \cdot M}(T)} \quad (28)$$

$$K_2(T) = \frac{[M](T)}{[M^*](T)} = \frac{\chi_M(T)}{\chi_{M^*}(T)} \quad (29)$$

which lets us express the molar fractions in terms of the common intermediate:

$$\chi_{M \cdot M}(T) = \frac{2\chi_{M^*}^2(T)[M]_0}{K_1(T)} \quad (30)$$

$$\chi_M(T) = K_2\chi_{M^*}(T) \quad (31)$$

Noting that at every temperature  $\sum_i \chi_i(T) = 1$ , we obtain a quadratic equation in  $\chi_{M^*}(T)$ :

$$\left(\frac{2[M]_0}{K_1(T)}\right)\chi_{M^*}^2(T) + (1 + K_2)\chi_{M^*}(T) - 1 = 0 \quad (32)$$

which has only one physically meaningful root:

$$\chi_{M^*}(T) = \frac{-(K_1(T) + K_1(T)K_2(T)) + \sqrt{(K_1(T) + K_1(T)K_2(T))^2 + 8[M]_0K_1(T)}}{4[M]_0} \quad (33)$$

Melting temperatures  $T_{m,1}$  and  $T_{m,2}$  can be defined as  $K_1(T_{m,1}) = [\mathbf{M}]_0$  and  $K_2(T_{m,2}) = 1$ , respectively. Thus, Equation (15) gives the following isochores:

$$K_1(T) = [\mathbf{M}]_0 \exp \left\{ -\frac{\Delta H_1}{R} \left( \frac{1}{T} - \frac{1}{T_{m,1}} \right) \right\} \quad (34)$$

$$K_2(T) = \exp \left\{ -\frac{\Delta H_2}{R} \left( \frac{1}{T} - \frac{1}{T_{m,2}} \right) \right\} \quad (35)$$

$$(36)$$

As before, the observed chemical shift  $\delta_{\text{obs}}$  is a weighted average for all species in fast exchange:

$$\delta_{\text{obs}} = \delta_{\mathbf{M}}\chi_{\mathbf{M}}(T) + \delta_{\mathbf{M}^*}\chi_{\mathbf{M}^*}(T) + \delta_{\mathbf{M}\cdot\mathbf{M}}\chi_{\mathbf{M}\cdot\mathbf{M}}(T) \quad (37)$$

which can be combined with Equations (30) and (31) to yield:

$$\delta_{\text{obs}} = \delta_{\mathbf{M}}K_2\chi_{\mathbf{M}^*}(T) + \delta_{\mathbf{M}^*}\chi_{\mathbf{M}^*}(T) + \delta_{\mathbf{M}\cdot\mathbf{M}}\frac{2\chi_{\mathbf{M}^*}^2(T)[\mathbf{M}]_0}{K_1(T)} \quad (38)$$

A model defined by Equations (33), (34), (35) and (38) is then fitted to the experimental data with  $\Delta H_1$ ,  $\Delta H_2$ ,  $T_{m,1}$ ,  $T_{m,2}$ ,  $\delta_{\mathbf{M}\cdot\mathbf{M}}$ ,  $\delta_{\mathbf{M}^*}$ , and  $\delta_{\mathbf{M}}$  as parameters, using **lmfit** package in Python.<sup>2</sup> Analysis was performed in Jupyter and the results were plotted using **matplotlib**.<sup>4,5</sup>

```

1 # FITTING THREE-STATE ISOCHORE TO VT NMR DATA
2 # Non-linear regression done using lmfit
3 # https://lmfit.github.io/lmfit-py/model.html
4
5 from lmfit import Parameters, Model
6 import numpy as np
7
8 # Parameters definition with initial and fixed values
9 # add with tuples: (NAME VALUE VARY MIN MAX EXPR BRUTE_STEP)
10
11 c = 0.00744 # Total concentration (M)
12 R = 8.314 # Universal gas constant (J / mol K)
13
14 fit_params = Parameters()
15 fit_params.add_many(('dH1', 30000, True, None, None, None, None),
16                    ('Tg1', 300, True, None, None, None, None),
17                    ('dH2', 30000, True, None, None, None, None),
18                    ('Tg2', 394, True, None, None, None, None),
19                    ('d_K1', -60.8600, False, None, None, None, None),
20                    ('d_L1', -60, True, None, None, None, None),
21                    ('d_U1', -58.6528, False, None, None, None, None),
22                    ('d_K2', -60.8600, False, None, None, None, None),
23                    ('d_L2', -58, True, None, None, None, None),
24                    ('d_U2', -58.6528, False, None, None, None, None))
25

```

```

26 # EQUILIBRIUM: K <=(K1)=> 2L // L <=(K2)=> U
27 # Molar fractions and equilibrium constants
28
29 def xL(T, dH1, Tg1, dH2, Tg2):
30     return (K1(T,dH1,Tg1)*(-(1+(K2(T,dH2,Tg2)))) + np.sqrt((1+(K2(T,dH2,Tg2))) * \
31             (1+(K2(T,dH2,Tg2))) + 8*c/K1(T,dH1,Tg1)))/(4*c))
32
33 def xK(T, dH1, Tg1, dH2, Tg2):
34     return 2*c*xL(T, dH1, Tg1, dH2, Tg2)* \
35         xL(T, dH1, Tg1, dH2, Tg2) / (K1(T, dH1, Tg1))
36
37 def xU(T, dH1, Tg1, dH2, Tg2):
38     return (K2(T, dH2, Tg2)) * xL(T, dH1, Tg1, dH2, Tg2)
39
40 def K1(T, dH1, Tg1):
41     return c*np.exp(-dH1/R*(1/T-1/Tg1))
42
43 def K2(T, dH2, Tg2):
44     return np.exp(-dH2/R*(1/T-1/Tg2))
45
46 # MODEL FUNCTION: Observed chemical shift (weighted average)
47
48 def d_obs(T, dH1, Tg1, dH2, Tg2, d_K, d_L, d_U):
49     return xK(T, dH1, Tg1, dH2, Tg2)*d_K + xL(T, dH1, Tg1, dH2, Tg2)*d_L + \
50         xU(T, dH1, Tg1, dH2, Tg2)*d_U
51
52 # Objective function to be minimised
53 # Returns array of residuals of the model
54
55 def fit_function(fit_params, T, F1, F2):
56     dH1 = fit_params['dH1'].value
57     Tg1 = fit_params['dH1'].value
58     dH2 = fit_params['dH1'].value
59     Tg2 = fit_params['dH1'].value
60     d_K1 = fit_params['d_K1'].value
61     d_L1 = fit_params['d_L1'].value
62     d_U1 = fit_params['d_U1'].value
63     d_K2 = fit_params['d_K2'].value
64     d_L2 = fit_params['d_L2'].value
65     d_U2 = fit_params['d_U2'].value
66
67     modelF1 = d_obs(T, dH1, Tg1, dH2, Tg2, d_K1, d_L1, d_U1)
68     modelF2 = d_obs(T, dH1, Tg1, dH2, Tg2, d_K2, d_L2, d_U2)
69
70     residF1 = F1 - modelF1
71     residF2 = F2 - modelF2
72
73     return np.concatenate((residF1, residF2))
74
75 # Simultaneous fitting parameters to the two 19F signals
76 # T : dataframe containing sample temperatures (K)
77 # d_F1 : dataframe containing observed chemical shifts F1 (ppm)
78 # d_F2 : dataframe containing observed chemical shifts F2 (ppm)
79 # results : contains best fit parameters
80
81 results = minimize(fit_function, fit_params, args=(T, d_F1, d_F2), method='leastsq')
82
83 print(fit_report(results) + '\n' + fit_report(results2))

```

## 6.1 ADAD Three-State Melting Isochore - No Constraints

```
[[Fit Statistics]]
# fitting method = leastsq
# function evals = 12
# data points = 32
# variables = 10
chi-square = 7.5876e-04
reduced chi-square = 3.4489e-05
Akaike info crit = -320.785961
Bayesian info crit = -306.128602
[[Variables]]
dH1: 29796.8620 +/- 4103.86205 (13.77%) (init = 29799.05)
Tg1: 333.436383 +/- 34.4010560 (10.32%) (init = 333.4191)
dH2: 33971.9826 +/- 9539.48370 (28.08%) (init = 33977.12)
Tg2: 405.408462 +/- 16.0680797 (3.96%) (init = 405.4011)
d_K1: -60.8544054 +/- 0.01954072 (0.03%) (init = -60.8544)
d_L1: -59.5105048 +/- 0.54125404 (0.91%) (init = -59.51077)
d_U1: -58.6751958 +/- 0.17105372 (0.29%) (init = -58.67521)
d_K2: -60.8788143 +/- 0.03591207 (0.06%) (init = -60.8788)
d_L2: -58.7014142 +/- 0.90702552 (1.55%) (init = -58.70186)
d_U2: -58.8332475 +/- 0.53358457 (0.91%) (init = -58.833)
[[Correlations]] (unreported correlations are < 0.100)
C(Tg1, d_L2) = 1.000
C(d_L1, d_L2) = 0.999
C(Tg1, d_L1) = 0.997
C(d_L1, d_U2) = -0.992
C(d_L2, d_U2) = -0.988
C(Tg1, d_U2) = -0.985
C(dH1, d_K2) = 0.972
C(dH1, Tg1) = -0.965
C(dH1, d_L2) = -0.960
C(d_K1, d_K2) = 0.953
C(dH1, d_L1) = -0.949
C(dH1, d_K1) = 0.943
C(dH1, d_U2) = 0.935
C(dH1, dH2) = 0.929
C(dH2, Tg2) = -0.920
C(Tg1, dH2) = -0.912
C(dH2, d_L2) = -0.903
C(Tg1, d_K2) = -0.886
C(Tg1, d_K1) = -0.884
C(d_K1, d_L2) = -0.883
C(d_K1, d_L1) = -0.882
```

## 6.2 ADAD Three-State Melting Isochore - Limiting Shifts Constrained

```
[[Fit Statistics]]
# fitting method = leastsq
# function evals = 8
# data points = 32
# variables = 6
chi-square = 0.00124359
reduced chi-square = 4.7830e-05
Akaike info crit = -312.975697
Bayesian info crit = -304.181282
[[Variables]]
dH1: 31403.5044 +/- 475.490681 (1.51%) (init = 31403.57)
Tg1: 324.265341 +/- 1.87996359 (0.58%) (init = 324.2652)
dH2: 37122.5690 +/- 2020.41044 (5.44%) (init = 37122.87)
Tg2: 404.498504 +/- 1.59616141 (0.39%) (init = 404.4984)
d_K1: -60.86 (fixed)
d_L1: -59.6202713 +/- 0.02834152 (0.05%) (init = -59.62027)
d_U1: -58.6528 (fixed)
d_K2: -60.86 (fixed)
d_L2: -58.9369289 +/- 0.03677951 (0.06%) (init = -58.93693)
d_U2: -58.6528 (fixed)
[[Correlations]] (unreported correlations are < 0.100)
C(d_L1, d_L2) = 0.944
C(Tg1, d_L2) = 0.942
C(Tg2, d_L1) = 0.838
C(dH1, dH2) = 0.834
C(Tg2, d_L2) = 0.823
C(Tg1, d_L1) = 0.810
C(dH1, Tg1) = -0.789
C(Tg1, Tg2) = 0.739
C(Tg1, dH2) = -0.681
C(dH1, d_L2) = -0.591
C(dH2, d_L2) = -0.430
C(dH2, Tg2) = -0.397
C(dH1, d_L1) = -0.357
C(dH1, Tg2) = -0.308
C(dH2, d_L1) = -0.178
```

## 7 Molecular Modelling

Molecular mechanics calculations were performed in Schrödinger Suite 2016-4 using MacroModel software.<sup>6</sup> Simplified structures were used, in which the end-capping protecting groups and the *iso*-butyl chains on the phosphine oxides were changed to methyl groups in order to reduce the computational cost. All structures were minimised first and the minimised structures were then used as the starting molecular structures for all MacroModel conformational searches. Two independent searches were performed, using MMFFs and OPLS3 as force fields with implicit solvation in chloroform, as implemented in the software.<sup>7</sup> The charges were defined by the force field library and no cut-off was used for non-covalent interaction. For the ADAD dimers, two hydrogen bonds between the inner residues were constrained and the outer residues were initially constrained as duplex or kissing stem-loops, with distance defined as  $(1.7 \pm 0.5)$  Å and force constant of 100. No constraints were used for monomeric the ADAD. Mixed torsional/Large-Scale Low-Mode Sampling was used with Enhanced torsion sampling options, so as to include ester C–O bonds, and 100 steps per rotatable bond. Maximum of 10,000 iterations were performed per sample with redundant conformers eliminated using root mean square deviation (RMSD) of 2 Å. The minima converged on a Polak-Ribiere Conjugate Gradient (PRCG) with a threshold of 1.0.

The resulting lowest energy structures were used as the starting points for a further conformational search with only the two hydrogen bonds between the two inner residues in dimeric ADAD constrained. The hydrogen bond constraints for the outer residues were removed in the further conformational searches. The second search was only performed using OPLS3 force field. Above sampling parameters were changed to a maximum of 20,000 iterations and the structure redundancy criterion was reduced to 1 Å RMSD. Mixed torsional/Large-Scale Low-Mode Sampling was still used with Enhanced torsion sampling options and 100 steps per rotatable bond, and the minima converged on PRCG with a threshold of 1.0. The lowest energy conformation was further minimised with OPLS3 force field and PRCG with a threshold of 0.01.

## References

- (1) Szczypiński, F. T.; Hunter, C. A. *Chemical Science* **2019**, *10*, 2444–2451.
- (2) Newville, M.; Stensitzki, T.; Allen, D. B.; Ingargiola, A. LMFIT: Non-Linear Least-Square Minimization and Curve-Fitting for Python., version 0.8.0, 2014.
- (3) Thordarson, P. *Chem. Soc. Rev.* **2011**, *40*, 1305–1323.

- (4) Perez, F.; Granger, B. E. *Comput. Sci. Eng.* **2007**, *9*, 21–29.
- (5) Hunter, J. D. *Comput. Sci. Eng.* **2007**, *9*, 90–95.
- (6) Schrödinger Release 2016-4: MacroModel., New York, NY, 2016.
- (7) Harder, E. et al. *J. Chem. Theory Comput.* **2016**, *12*, 281–296.
